# 1 **A Harmonized Atlas of Spinal Cord Cell Types and Their Computational Classification**

2

3 Daniel E. Russ<sup>1,\*</sup>, Ryan B. Patterson Cross<sup>2,\*</sup>, Li Li<sup>2</sup>, Stephanie C. Koch<sup>3</sup>, Kaya J.E. Matson<sup>2</sup>, Ariel J.  
4 Levine<sup>2,#</sup>

5

6 <sup>1</sup> Division of Cancer Epidemiology and Genetics, Data Science Research Group, National Cancer Institute, NIH,  
7 Rockville, MD, USA

8 <sup>2</sup> Spinal Circuits and Plasticity Unit, National Institute of Neurological Disorders and Stroke, NIH, Bethesda, MD,  
9 USA

10 <sup>3</sup> Department of Neuroscience, Physiology and Pharmacology, Division of Biosciences, University College of  
11 London, London, UK

12

13 \* equal contribution

14 # corresponding author: Ariel Levine ([ariel.levine@nih.gov](mailto:ariel.levine@nih.gov))

15

16

17

## 18 **ABSTRACT:**

19

20 Single cell sequencing is transforming many fields of science but the vast amount of data it  
21 creates has the potential to both illuminate and obscure underlying biology. To harness the  
22 exciting potential of single cell data for the study of the mouse spinal cord, we have created a  
23 harmonized atlas of spinal cord transcriptomic cell types that unifies six independent and  
24 disparate studies into one common analysis. With the power of this large and diverse dataset,  
25 we reveal spinal cord cell type organization, validate a combinatorial set of markers for in-tissue  
26 spatial gene expression analysis, and optimize the computational classification of spinal cord  
27 cell types based on transcriptomic data. This work provides a comprehensive resource with  
28 unprecedented resolution of spinal cord cell types and charts a path forward for how to utilize  
29 transcriptomic data to expand our knowledge of spinal cord biology.

30

31

## 32 **INTRODUCTION**

33

34 A revolution in single cell sequencing technologies is transforming many fields of biology. By  
35 sequencing the cDNA or open chromatin from many individual cells and using computational  
36 analysis to identify shared patterns of gene expression or epigenetic structure, we may  
37 simultaneously define cell “types”, characterize their molecular signatures, and track how each  
38 cell type in a tissue changes in different biological conditions such as development and disease.  
39 Within the central nervous system, this approach may also reveal the molecular basis of the  
40 impressive levels of neuronal diversity, can provide new marker genes for developing genetic  
41 tools to manipulate neuronal function, and may help to reveal the cellular basis of behavior.

42

43 In the postnatal mouse spinal cord alone, there have been nine papers profiling single cell RNA  
44 expression that, combined, cover a range of biological parameters, including age, tissue region,  
45 developmental lineage, and circuit features<sup>1-9</sup>. These studies provide a powerful and multi-

46 faceted perspective on spinal cord cell types, yet despite this significant effort and a rich  
47 literature of spinal cord cell type characterization, there is still no consensus cell type “atlas” of  
48 the spinal cord. On the contrary, by conducting these studies independently, the number of  
49 nomenclature systems for spinal cord cell types has been multiplied without clarification of how  
50 these studies overlap, thereby leaving the underlying biology yet to be understood. Major  
51 obstacles include the lack of an accepted ground truth of cell types in this tissue<sup>10</sup> that could  
52 form the basis of a reference atlas and the difficulty in comparing data between studies even  
53 when the same tissue types and techniques are used<sup>3,5</sup>. Indeed, these are among the “grand  
54 challenges” that scientists face as we re-discover the cells and tissues we study through the  
55 perspective of single cell profiling<sup>11</sup>.

56  
57 To begin to overcome these challenges within the mammalian central nervous system, we  
58 sought (1) to establish a harmonized atlas of postnatal spinal cord cell types that is shared  
59 across biological time, experimental technique, and laboratory, (2) to enhance the usability of  
60 this data for broader field of spinal cord biology, and (3) to test different tools to facilitate the  
61 future classification of cells into these types. We began by performing an integrated and  
62 merged analysis of the raw data from the first six publicly available postnatal spinal cord single  
63 cell datasets. Next, we clustered the cells and nuclei of this meta-dataset to reveal 15 non-  
64 neural and 69 neural cell types, thereby providing a cell type resolution and characterization  
65 that surpasses all prior studies. By analyzing gene expression profiles across families of  
66 clustered cell types, we created a combinatorial panel of marker genes and validated it with  
67 high-content in situ hybridization. Finally, we tested a range of automated classification  
68 algorithms and identified a two-tiered model based on label transfer and neural networks as  
69 the best method for classifying spinal cord cell types. We have now developed “SeqSeek”, a  
70 web-based resource for querying this data by gene or cell type and for accessing automated  
71 classification algorithm of any spinal cord cell or nucleus from raw sequencing data.

72

73

## 74 **RESULTS**

75

### 76 **Merged Analysis of Spinal Cord Cells and Nuclei**

77

78 The work here is based on a merged dataset with over one hundred thousand cells and nuclei  
79 from the first six published studies of the postnatal mouse spinal cord<sup>1-6</sup>. These studies cover a  
80 range of biological and experimental parameters (Figure 1A and Supplemental Figure 1). To  
81 best compare the data from these studies, we began with the raw sequencing reads from each  
82 study and performed our own data processing with uniform methods and filters. All sequencing  
83 reads were aligned to a common genomic sequence that included both exons and introns and  
84 common filtering thresholds were used for inclusion (>200 genes per cell/nucleus) and  
85 exclusion (<5% percent of genes from mitochondria). As a result, this merged dataset contains  
86 more cells and nuclei than were analyzed in the original studies and a uniform set of genes  
87 (Supplemental Figure 1).

88

89

90

91 **Figure 1**

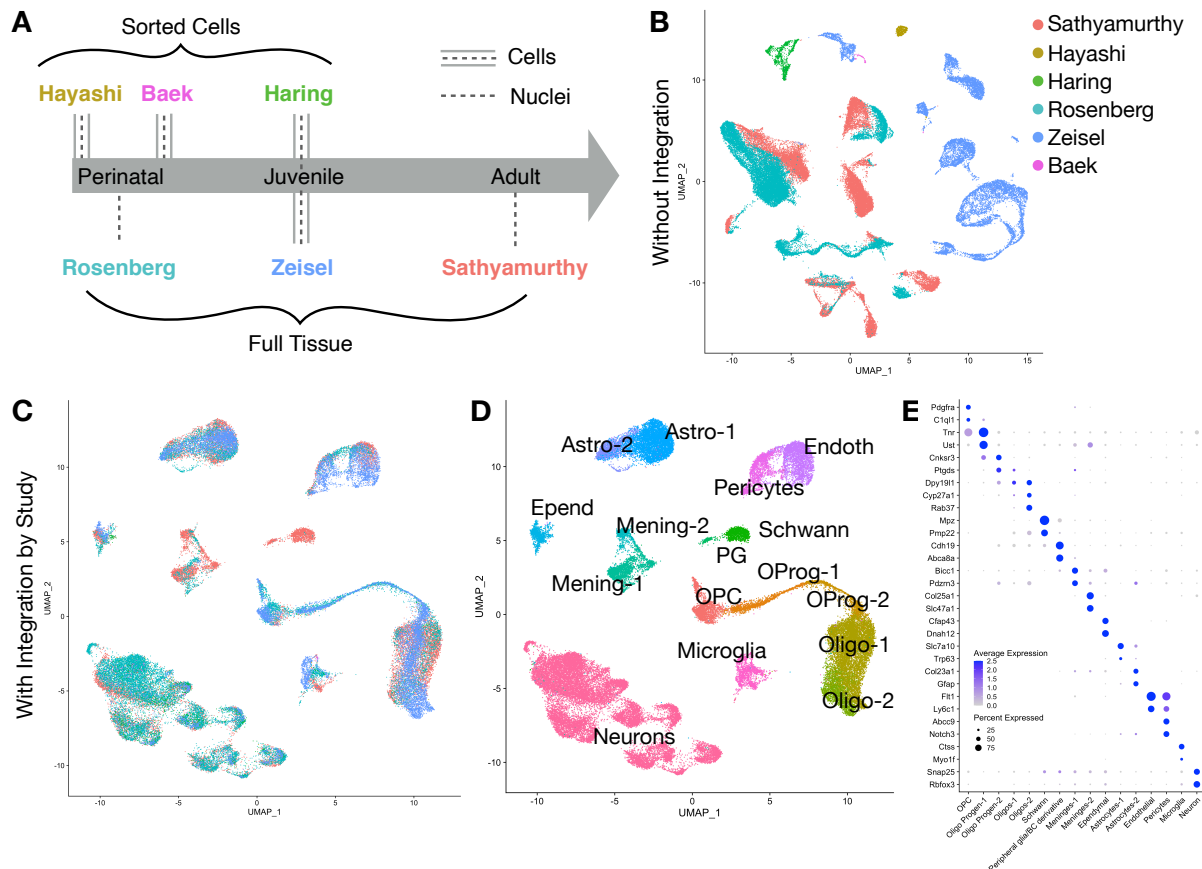

92

93 **Figure 1. Integration of six independent studies on single cell spinal cord data reveals the major cell types of the**  
 94 **spinal cord.** (A) Six independent studies that used single cell/nucleus RNA sequencing to analyze mouse spinal cord  
 95 cell types were analyzed, covering a range of mouse ages and technical approaches. (B) UMAP presentation of the  
 96 52,623 cells/nuclei in the final dataset, without integration and colored by the study of origin (colors in the  
 97 legend). (C) UMAP presentation of the same 52,623 cells/nuclei in the final dataset, integrated by study and  
 98 colored by the study of origin (same colors as in (B)). (D) UMAP presentation of the cells/nuclei in the final dataset,  
 99 integrated by study and colored by cell type. (E) Dot plot of the expression of marker genes for the major coarse  
 100 cell types. Average expression for each cluster is shown by color intensity and the percent of cells/nuclei in each  
 101 cluster that expressed each gene is shown by dot diameter.

102

103 Our first major goal was to create a harmonized atlas of the major spinal cord cell types that are  
 104 shared across these studies. Previous reports have used the correlation in gene expression  
 105 between clusters to link cell types across studies, but this approach yielded weak correlations,  
 106 even between studies in which the same sample age and tissue dissociation method were  
 107 used<sup>3,5</sup>. We hypothesized that co-clustering cells and nuclei across all of the studies would  
 108 provide an improved ability to relate cell types in one study to those in another. We performed  
 109 dimensionality reduction using principal component analysis and visualized the cells and nuclei  
 110 using UMAPs. Unfortunately, the cells or nuclei from each study segregated from each other

111 almost completely, indicating that the study of origin is a major source of variability in the  
112 dataset (Figure 1B). This technical limitation obscured all cell type distinctions.

113  
114 To reduce experimental sources of variability and reveal the core set of spinal cord cell types,  
115 we used a recently developed integration method to align the cells and nuclei across studies <sup>12-</sup>  
116 <sup>15</sup>. With this approach, the cells and nuclei from all six studies were spatially interposed in a  
117 UMAP visualization of principal component space (Figure 1C) and separated into groupings that  
118 each expressed a panel of well-established cell type markers such as Snap25 (neurons), Mbp  
119 (oligodendrocytes), Aqp4 (astrocytes), and Ctss (microglia). After preliminary clustering and the  
120 removal of low-quality clusters and doublets (see Methods), we obtained a merged dataset of  
121 over fifty thousand cells and nuclei. The majority of these cells/nuclei from this analysis are  
122 from the three studies that used high throughput collection and barcoding techniques (the  
123 Sathyamurthy, Rosenberg, and Zeisel datasets) (Supplemental Figure 1). A comparison across  
124 studies revealed that these high throughput studies detected fewer genes per cell/nucleus than  
125 studies that used single well technical approaches (the Hayashi, Haring, and Baek datasets), and  
126 studies that used cells (the Hayashi, Haring, Zeisel, and Baek datasets) detected more genes per  
127 cell/nucleus but had relatively higher levels of immediate early gene and stress gene expression  
128 than did studies that used nuclei (the Sathyamurthy and Rosenberg datasets) (Supplemental  
129 Figure 1). These trends across technical approaches were expected based on other reports  
130 (reviewed<sup>12</sup>).

131  
132

### 133 **A Harmonized Atlas of Major Cell Types**

134  
135 Next, we performed coarse clustering to define the major cell types of the mouse spinal cord  
136 (Figure 1D,E). Sixteen major types were identified that represent all known classes of spinal  
137 cord cell types; a characterization and resolution that surpasses all of the original six studies in  
138 capturing the full diversity of spinal cord cell types. These cell types are: (1) oligodendrocyte  
139 precursor cells; (2-3) two stages of oligodendrocyte progenitors; (4-5) two types of  
140 oligodendrocytes that likely correspond to myelinating and mature cell types and that blend  
141 into each other; (6) Schwann cells; (7) peripheral glia; (8-9) two types of meninges that likely  
142 correspond to vascular leptomenigeal cells and arachnoid barrier cells; (10) ependymal cells  
143 that surround the central canal; (11-12) two types of astrocytes that likely correspond to a  
144 major population of regular astrocytes and a minor population of Gfap-expressing  
145 proliferating/activated/white matter astrocytes; (13-14) two types of vascular cells that likely  
146 correspond to endothelial cells and pericytes; (15) microglia; and (16) neurons, which are  
147 discussed in detail below.

148  
149 As expected, the cell types that were derived from each study corresponded to the techniques  
150 used to isolate the cells or nuclei (Supplemental Figure 1). The three studies that FACS sorted  
151 neurons from the spinal cord (Hayashi, Haring, and Baek datasets) predominantly gave rise to  
152 cells in the neuronal sub-clusters as well as the non-neural cells most likely represent doublets.  
153 Moreover, among the three studies that examined all cell types, the early postnatal Rosenberg  
154 study showed an enrichment of immature cells of oligodendrocyte lineage relative to the adult



155 Sathyamurthy study, while the adolescent Zeisel study showed an intermediate distribution.  
156 The only study to dissect the spinal cord including the dorsal and ventral spinal roots (the  
157 Sathyamurthy dataset) was the only source of Schwann and peripheral glia cells that would be  
158 located in these roots.

159

160

## 161 **A Harmonized Atlas of Neuronal Populations**

162

163 We next focused our analysis on neuronal populations to further probe their impressive  
164 diversity and to define a reference set of cell types for understanding the spinal cord cellular  
165 basis of behavior. Based on the coarse cell type assignments above, we selected and clustered  
166 all neuronal cells/nuclei. Preliminary analysis revealed that putative dorsal horn clusters  
167 separated well in principal component space while putative mid and ventral horn clusters did  
168 not, which prompted us to perform a targeted sub-clustering of all mid and ventral cells/nuclei  
169 (see Methods). 69 neuronal clusters were identified (Figure 2A, Table 1, Supplemental Movie 1,  
170 Supplemental Table 2) and the neurotransmitter status and putative regional location (dorsal  
171 horn, mid region, ventral horn) were determined by marker gene expression and comparison to  
172 the original six studies. We observed 20 dorsal excitatory clusters, 14 dorsal inhibitory clusters,  
173 10 deep dorsal/mid excitatory clusters, 7 deep dorsal/mid inhibitory clusters, 8 ventral  
174 excitatory clusters, 6 ventral inhibitory clusters, 3 cholinergic motoneuron clusters, and 1  
175 cluster of cerebrospinal fluid contacting neurons. As was observed in the full dataset with all  
176 cell types, neuronal cells/nuclei from studies that used massively parallel approaches  
177 (Sathyamurthy, Rosenberg, Zeisel) had fewer genes per cell/nucleus and that studies that those  
178 which used nuclei (Sathyamurthy and Rosenberg) had lower levels of immediate early gene and  
179 stress gene expression than studies that used cells (Hayashi, Haring, Zeisel and Baek)  
180 (Supplemental Figure 2).

181

182 **Figure 2**

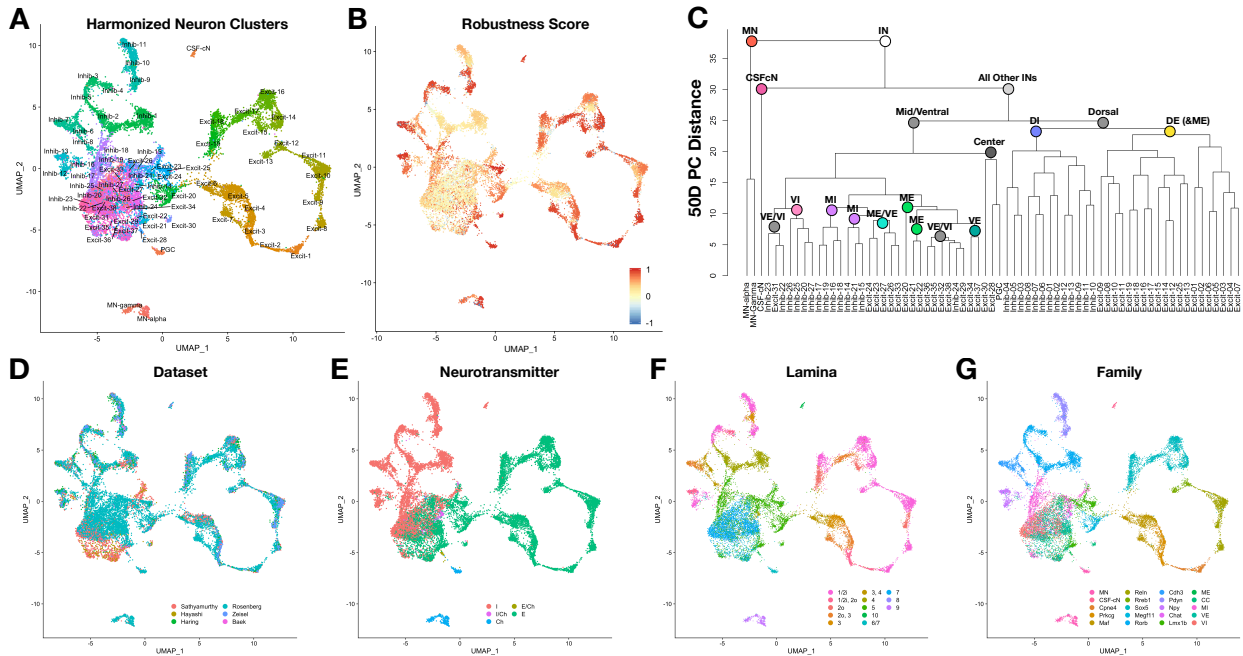

183  
 184 **Figure 2. Harmonized atlas of 69 populations of spinal cord neurons.** (A) UMAP presentation of 19,353 neuronal  
 185 cells/nuclei of the postnatal mouse spinal cord, colored and annotated by cell-type cluster. (B) The same  
 186 cells/nuclei, colored by robustness (silhouette) score, which was calculated based on bootstrapped co-clustering  
 187 frequency (see Methods). (C) Dendrogram showing the relationships between the 69 neuronal cell types based on  
 188 their distance from each other in the 50-dimensional principal component (PC) space. MN=motoneuron;  
 189 IN=interneurons (and projection neurons); CSF-cN=cerebrospinal fluid contacting neurons; DE=dorsal excitatory;  
 190 DI=dorsal inhibitory; ME=mid excitatory; MI=mid inhibitory; VE=ventral excitatory; VI=ventral inhibitory; “center”  
 191 represents a group of 3 cell types located near lamina X – the center of the spinal cord. (D-G) UMAP presentation  
 192 of 19,353 neuronal cells/nuclei of the postnatal mouse spinal cord, colored by study of origin (E), neurotransmitter  
 193 (F), lamina (G), and family (H). (E) I=inhibitory, I/Ch=inhibitory cholinergic, Ch = cholinergic; E/Ch=excitatory  
 194 cholinergic; E=excitatory. (F) Laminae were assigned based on in situ hybridization validation experiments and are  
 195 colored by the approximate depth from the dorsal surface of the cord (hot pink to violet). (G) See main text for  
 196 description of neuronal families.

197  
 198 To determine the robustness of these clusters, we used a bootstrapped co-clustering test of the  
 199 consistency with which cells and nuclei in each cluster remain together upon repeated  
 200 clustering (Figure 2B, Supplemental Figure 2). As expected, dorsal clusters showed very high  
 201 robustness with this measure, whereas mid and ventral clusters showed moderate to low  
 202 robustness, a general feature that was consistent with previous observations<sup>1,4</sup>. This most likely  
 203 reflects the highly similar and even overlapping patterns of gene expression amongst mid and  
 204 ventral clusters. Similarly, a dendrogram analysis of the distance between the clusters within  
 205 the 50-dimensional principal component space also revealed that dorsal clusters were well  
 206 separated from each other, while mid and ventral clusters were much closer to each other in  
 207 this reduced gene expression space (Figure 2C). Intriguingly, neurons that are located at the  
 208 spatial mid-point between the dorsal and ventral sides of the cord (preganglionic cells and two  
 209 excitatory populations near the central canal) were organized as a single branch (Figure 2C;  
 210 “center”), further underscoring the importance of spatial distribution as an organizing principle  
 211 in the spinal cord.

212

213 Next, we sought to characterize these clusters at a molecular level and to define their marker  
214 genes. There are multiple approaches for identifying cell type markers based in single cell data.  
215 Commonly used methods such as such as the Wilcox Rank Sum test and ROC analysis use  
216 differential expression to identify genes that are enriched within one identified cell cluster as  
217 compared to all other clusters and we used this approach to generate candidate markers for  
218 each cluster (Supplemental Table 1). However, these approaches do not prioritize markers that  
219 are shared between related clusters or those markers that are well-established for a given  
220 tissue, nor do they produce an efficient final set of markers that can be used to define all  
221 neuronal cell types. To overcome these obstacles, we therefore used a combination of Wilcox  
222 and ROC individual cluster markers, Wilcox and ROC markers for dendrogram branches, and  
223 established markers from the literature to generate a panel of combinatorial markers for spinal  
224 cord neurons that follows a “family name” and “given name” analogy. For example, Excit-14  
225 through Excit-19 comprise the “Sox5” family. They are distinguished by expression of Col5a2  
226 (Excit-14), Col5a2 and Enpp1 (Excit-15), Col5a2, Enpp1, and Tac1 (Excit-16), Dcx expression and  
227 being present almost exclusively at early post-natal stages (Excit-17), Nmu (Excit-18), and Tac2  
228 (Excit-19) (Figure 3 and Table 1).

229

230 To determine whether this panel of markers corresponded to in situ gene expression patterns  
231 and to define the anatomical distribution of each cluster, we performed high-content in situ  
232 hybridization with combinatorial sets of marker gene probes (Supplemental Table 3). We tested  
233 95 unique genes (of which 79 showed reliable expression in the adult lumbar spinal cord) and  
234 analyzed gene expression in ten overlapping sets of 12 genes each. For each set, hundreds of  
235 cells were counted from three spinal cords and their locations mapped by lamina. Using this  
236 approach, 71% of neurons in the adult lumbar spinal cord could be identified as belonging to  
237 one of the 69 neuronal clusters (2057/2894 total) and an additional 9% of neurons could be  
238 identified as belonging to pairs of closely related clusters (266/2894 total) (Supplemental Table  
239 3). We found that some sets (such as those that sub-type dorsal inhibitory neurons) could be  
240 used to identify 80-90% of cells, while other sets (such as those that sub-type mid and ventral  
241 neurons) could only identify 40-60% of neurons. This further supports the view that dorsal  
242 neurons are more molecularly distinct while mid and ventral neurons are more difficult to  
243 distinguish from one another. This detailed in situ hybridization analysis also revealed the in-  
244 tissue location and prevalence of each of the lumbar adult neuronal cell types and can serve to  
245 translate single cell sequencing data back into tissue-based analysis.

246

247

248 **Figure 3**

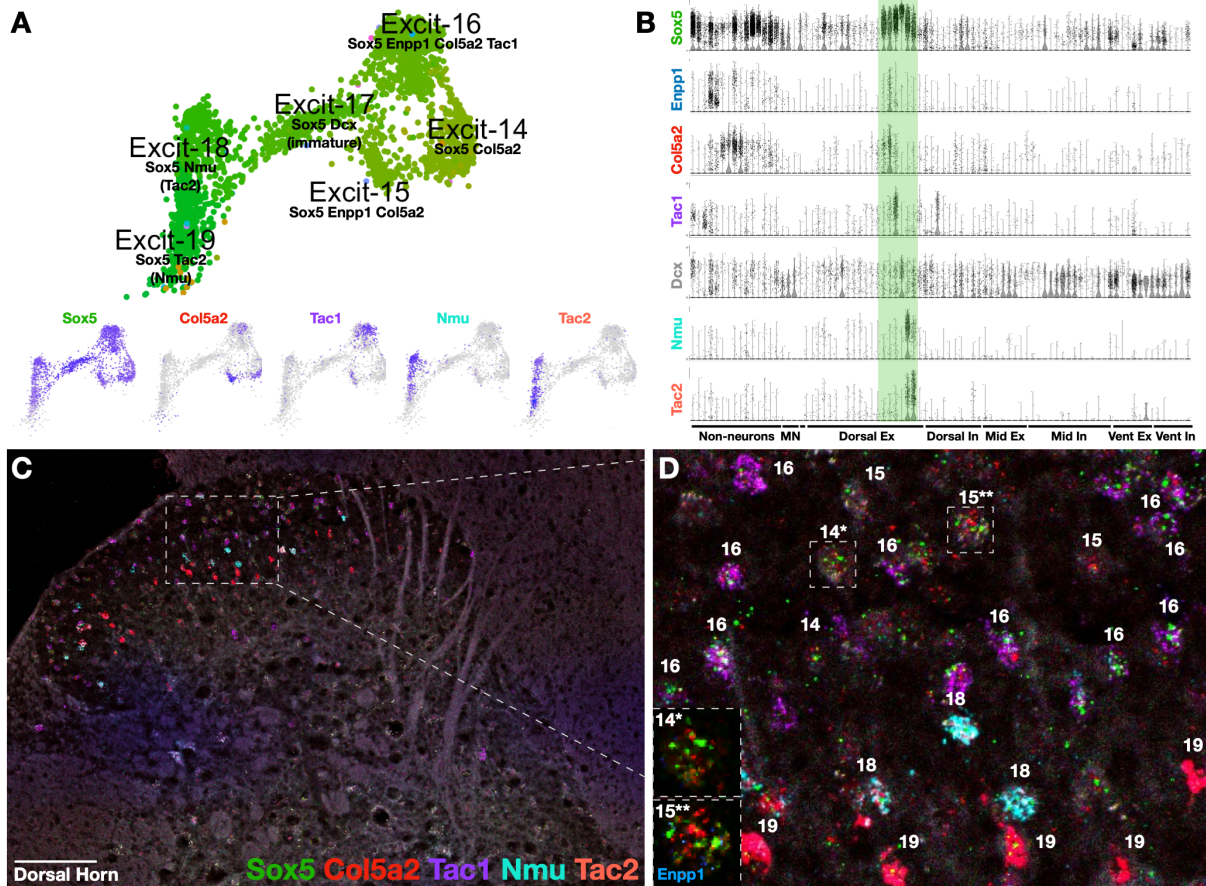

249  
 250  
 251 **Figure 3. The Sox5 dorsal excitatory family is sub-divided into individual clusters by a panel of marker genes.** (A)  
 252 The region of the neuron cell types UMAP for Excit-14 through Excit-19, labeled with relevant marker genes (top)  
 253 and single feature plots of selected marker genes, where expression is coded from absent (light gray) through  
 254 highly expressing (dark purple) (bottom). (B) Violin plot of the distribution of selected marker genes across all 84  
 255 clusters, including non-neurons, MN= motoneurons, CSF-cN=cerebrospinal fluid contacting neurons, DE=dorsal  
 256 excitatory; DI=dorsal inhibitory; ME=mid excitatory; MI=mid inhibitory; VE=ventral excitatory; VI=ventral  
 257 inhibitory. Each dot represents a single cell or nucleus and the Sox5 family dorsal excitatory family is highlighted  
 258 with the olive green bar. (C) RNA in situ hybridization of selected marker genes Sox5, Col5a2, Tac1, Nmu, Tac2 on  
 259 an adult mouse lumbar spinal cord section. 20x tiled image, with brightness and contrast adjusted. (D) Zoomed  
 260 region of (C). Cells were assigned to individual excitatory clusters (see individual numbers) based on marker gene  
 261 expression. Inset show representative cells of Excit-14 (14\*) and Excit-15 (15\*\*) with in situ hybridization for Sox5  
 262 (green), Col5a2 (red), Enpp1 (blue). Scale bar is 100  $\mu$ m.

263 **Table 1**

| Cluster  | Lamina       | %    | NT      | Family   | Individual Markers |          |                     |                |
|----------|--------------|------|---------|----------|--------------------|----------|---------------------|----------------|
| MN-alpha | 9            | 1.1  | Chat    | MN       | Spp1               | Poin     |                     |                |
| MN-gamma | 9            | 0.5  | Chat    | MN       | Esrg               | Htr1f    |                     |                |
| P-GC     | 7-IML        | N/A  | Chat    | MN       | Gfra3              | Nos1     | Fbn2                |                |
| CSF-cN   | 10           | 0.3  | Slc6a1  | CSF-cN   | Pkd21l1            |          |                     |                |
| Excit-1  | 1/2o         | 0.6  | Slc17a6 | Cpne4    | Dach2              | (Cck)    | (Cck)               |                |
| Excit-2  | 1/2o/2i      | 3.7  | Slc17a6 | Cpne4    | Prkcg              | (Rorb)   | Cdh3                |                |
| Excit-3  | 1/2o/2i      | 3.8  | Slc17a6 | Prkcg    | Cck                | Calb1    | Trh                 |                |
| Excit-4  | 2/3          | 2.8  | Slc17a6 | Prkcg    | (Prkcg)            | Nts      | Calb1-hi            |                |
| Excit-5  | 2/3/4        | 3.2  | Slc17a6 | Maf      | (Cck)              | Pvalb    |                     |                |
| Excit-6  | 3/4          | 2.4  | Slc17a6 | Maf      | Rorb               | Cpne4    |                     |                |
| Excit-7  | N/A          | N/A  | Slc17a6 | Maf      | Dcx                | (Nglu3)  |                     |                |
| Excit-8  | 1/2          | 1.4  | Slc17a6 | Reln     | Trhr               | (Car12)  | (Grp)               |                |
| Excit-9  | 1/2/3        | 1.7  | Slc17a6 | (Reln)   | (Reln)             | Grp      | Calb2               | Sntb1          |
| Excit-10 | 1/2          | 2.0  | Slc17a6 | Reln     | Car12              | Nmur2    | (Grp)               |                |
| Excit-11 | N/A          | 0.0  | Slc17a6 | Reln     | Car12              | Gabra2   |                     |                |
| Excit-12 | 1/2          | 0.2  | Slc17a6 | Rreb1    | Satb1              | Zim1     |                     |                |
| Excit-13 | 2/3          | 0.7  | Slc17a6 | Rreb1    | Nmur2              | (Satb1)  |                     |                |
| Excit-14 | 1/2o         | 1.7  | Slc17a6 | Sox5     | Col5a2             |          |                     |                |
| Excit-15 | 1/2/3        | 0.2  | Slc17a6 | Sox5     | Col5a2             | Enpp1    |                     |                |
| Excit-16 | 1/2o (2/3/4) | 6.5  | Slc17a6 | Sox5     | Col5a2             | Enpp1    | Tac1                |                |
| Excit-17 | N/A          | N/A  | Slc17a6 | Sox5     | Dcx                |          |                     |                |
| Excit-18 | 1/2o (2/3/4) | 2.7  | Slc17a6 | Sox5     | Nmu                | (Tac2)   |                     |                |
| Excit-19 | 2i (3/4)     | 1.9  | Slc17a6 | Sox5     | Tac2               | (Nmu)    |                     |                |
| Excit-20 | 4/5          | 2.0  | Slc17a6 | Megf11   | Mdga1              |          |                     |                |
| Inhib-1  | 3 (1/2o/2/4) | 7.4  | Slc6a1  | Rorb     | Sorcs3             | (Nppc)   | (Runx2)             |                |
| Inhib-2  | 3 (1/2o/2/4) | 10.3 | Slc6a1  | Adams5   | Kih14              | Sorcs3   | (Nppc)              |                |
| Inhib-3  | 1/2o/2/3/4   | 3.0  | Slc6a1  | Rorb     | Npc                | Nrgn     |                     |                |
| Inhib-4  | 1/2o/2i      | 0.4  | Slc6a1  | Rorb     | Rxfp2              |          |                     |                |
| Inhib-5  | 1/2o (3)     | 1.0  | Slc6a1  | Rorb     |                    |          |                     |                |
| Inhib-6  | 3/4 (1/2o)   | 1.3  | Slc6a1  | Cdh3     |                    |          |                     |                |
| Inhib-7  | 2/3 (1/2o/4) | 3.6  | Slc6a1  | Cdh3     | Konip2             | Pvalb    |                     |                |
| Inhib-8  | 3/4          | 0.5  | Slc6a1  | (Cdh3)   | Kih14-hi           |          |                     |                |
| Inhib-9  | 1/2o (2/3)   | 1.6  | Slc6a1  | Pdyn     | (Rorb)             | (Rspo3)  |                     |                |
| Inhib-10 | 3 (1/2o/4/5) | 9.7  | Slc6a1  | Pdyn     | Gal                | Mixl1    | Rspo3               |                |
| Inhib-11 | 1/2o/2/3     | 0.9  | Slc6a1  | Pdyn     | Gal                | (Rorb)   | Nrgn                |                |
| Inhib-12 | 1/2o/4       | 1.8  | Slc6a1  | Npy      | (Vgf)              |          |                     |                |
| Inhib-13 | 1/2o/2i      | 2.1  | Slc6a1  | Npy      | Orfp               |          |                     |                |
| Inhib-14 | 4            | 0.1  | Slc6a1  | Chat     | Slc6a5             | Nos1     |                     |                |
| Excit-21 | 4lat 5       | 0.5  | Slc17a6 | Lmx1b/ME | Lmx1b              | Zhfx3    | Nms                 | Lypd1          |
| Excit-22 | 4/5/6        | 0.1  | Slc17a6 | Lmx1b/ME | Lmx1b              | Zhfx3    |                     |                |
| Excit-23 | 4/med 5      | 1.2  | Slc17a6 | Lmx1b/ME | Lmx1b              | Nfib     | Cep112              | Cdh23, Satb1   |
| Excit-24 | 4/5/6        | 0.7  | Slc17a6 | Lmx1b/ME | Lmx1b              | (Nfib)   | (Cep112)            | Cdh23, (Satb1) |
| Excit-25 | 4/5/6        | 0.0  | Slc17a6 | Lmx1b/ME | Lmx1b              | Nfib     | Prox1               | Cdh23, (Satb1) |
| Excit-26 | 4            | 0.1  | Slc17a6 | ME       | Nfib               | (Prox1)  | (Satb1)             |                |
| Excit-27 | 4/5          | 1.3  | Slc17a6 | ME       | Adams2             | (Cep112) |                     |                |
| Excit-28 | 10           | 0.1  | Chat    | ME       | Pitx2              | Onecut2  | Pou6f2              |                |
| Excit-29 | 5/6          | 0.3  | Slc17a6 | ME       | Onecut2            | Pmfbp1   |                     |                |
| Excit-30 | 5            | 0.8  | Slc17a6 | CC#      | Gbx2               | Neurod2  | Lypd1, Pou6f2, Nfib |                |
| Inhib-15 | med 5        | 1.1  | Slc6a5  | MI       | Prox1              | Gabra1   | Nfib                |                |
| Inhib-16 | med 5        | 0.6  | Slc6a5  | MI       | Gpc3               | (Rorb)   | Sema5b              |                |
| Inhib-17 | N/A          | N/A  | Slc6a5  | MI       | Satb2              |          |                     |                |
| Inhib-18 | 5/6          | 0.5  | Slc6a5  | MI       | Sema5b             |          |                     |                |
| Inhib-19 | med 5        | 0.5  | Slc6a5  | MI       | Ccbe1              | Pou6f2   |                     |                |
| Inhib-20 | 5/6          | 1.0  | Slc6a5  | MI       | Tfap2b             |          |                     |                |
| Inhib-21 | 4/med 5      | 0.8  | Gad2    | MI       | Nfib               | Pax6     |                     |                |
| Excit-31 | 6/7/8        | 0.3  | Slc17a6 | VE       | Lhx9               | Gm26673  | Syt2                | Esrg           |
| Excit-32 | 6/7/8        | 0.4  | Slc17a6 | VE       | Lhx9               | Prlr     | Mdga1               | Esrg           |
| Excit-33 | N/A          | N/A  | Slc17a6 | VE       | Lhx9               |          |                     |                |
| Excit-34 | 6/7/8        | 0.4  | Slc17a6 | VE       | Birc2              | Pou6f2   | Lhx2                | Isl1           |
| Excit-35 | 6/7          | 0.5  | Slc17a6 | VE       | Vax2               | Pou6f2   | Shox2*              | Mdga1          |
| Excit-36 | 6/7          | 0.3  | Slc17a6 | VE       | Vax2               | Esrg     |                     | Gm26673        |
| Excit-37 | 7            | 0.8  | Slc17a6 | VE       | Vax2               | Shox2*   |                     |                |
| Excit-38 | 8            | N/A  | Slc17a6 | VE       | Sim1               | Rnf220   |                     |                |
| Inhib-22 | 7            | 0.1  | Slc6a5  | VI       | Foxp2              | (Esrb)   |                     |                |
| Inhib-23 | 7/8          | 0.6  | Slc6a5  | VI       | Foxp2              | Esrb     | Gm26673             | (Pvalb)        |
| Inhib-24 | 7            | 0.6  | Slc6a5  | VI       | Pou6f2             | Nr5a2    |                     |                |
| Inhib-25 | 7/8          | 1.1  | Slc6a5  | VI       | Esrb               | (Pvalb)  |                     |                |
| Inhib-26 | ventral 7    | 0.5  | Slc6a5  | VI       | Chrna7             | Calb1    | (Pvalb)             |                |
| Inhib-27 | 7            | 0.3  | Slc6a5  | VI       | Foxp2              | (Gata3)  | Pax2-hi             |                |

264  
 265 **Table 1. Cell-type census of 69 populations of spinal cord neurons.** The lamina, prevalence, a neurotransmitter  
 266 marker gene, “family” and individual markers for each neuronal cluster are shown. The clusters are color coded to  
 267 correspond approximately to their color in Figure 2A. The prevalence of each cluster was determined by counting  
 268 the confidently assigned cells of each type based on RNA in situ hybridization on sections from three animals and  
 269 are presented as the percent of the total number of confidently assigned neurons. Genes in parenthesis are  
 270 expressed at lower levels. Genes in gray were not validated (due to probe failure, being present only in postnatal  
 271 animals, or were not included in the analysis). # denotes a putative identity (see main text). \* denotes a marker  
 272 that was validated using RNAScope V2 but did not work in the RNAScope Hplex assay.



273

274 The cell type markers, laminar distribution, and estimated prevalence of each cluster are shown  
275 in Table 1, Figure 3, and Supplemental Figure 3 and are presented by family, with comments, as  
276 follows.

277

278 **MN (3 clusters):** The motoneuron (MN) family includes alpha motoneurons (MNa) which  
279 had relatively higher levels of *Spp1* and *Poln*, gamma motoneurons (MN<sub>g</sub>) which had  
280 relatively higher levels of *Esrrg* and *Htr1f*, and the related preganglionic cells (PGC)  
281 which expressed *Gfra3* and *Nos1*. This family was only comprised of nuclei from the  
282 Sathyamurthy and Rosenberg datasets, although the Zeisel dataset was also expected to  
283 include motoneurons. Of note, we did not detect refined sub-populations of MNa or  
284 PGC, although it is likely that further work will sub-fractionate MNa into fast and slow  
285 populations, or even specific muscle pools. Motoneurons are the final output cell  
286 through which the central nervous system controls muscles and the autonomic system  
287 and can be found in lamina 9 (MNa and MN<sub>g</sub>) or lamina 7/intermediolateral nucleus  
288 (PGC). Supplemental Figure 3A.

289

290 **CSF-cN (1 cluster):** Cerebrospinal fluid contacting neurons were distinguished by *Pkd2l1*,  
291 as well as *Pkd1l2*. This cluster was very distinct from other neuronal populations,  
292 inhibitory, and also expressed the early neuron marker *Sox2* and the V2b lineage  
293 markers *Gata2* and *Gata3*, suggesting an “immature” phenotype. Supplemental Figure  
294 3A.

295

296 **Dorsal Excitatory:**

297

298 **Cpne4 (2 clusters):** This dorsal, excitatory family was comprised of Excit-1 and  
299 Excit-2. Excit-1 was a rare subset, both in the harmonized clusters and in the in  
300 situ counts, that also expressed *Dach2* and Excit-2 was more prevalent and co-  
301 expressed *Prkcg* as well as *Cbln2*. Supplemental Figure 3B.

302

303 **Prkcg (2 clusters):** This dorsal, excitatory family was comprised of Excit-3 and  
304 Excit-4. *Prkcg* is a classic marker gene in the spinal cord and defined this family  
305 together with the neuropeptides *Cck* and *Trh* (Excit-3) and *Nts* (Excit-4). Both  
306 subsets also expressed *Calb1*, although it was not specific to these clusters. This  
307 family was also close to Excit-7, an immature cluster grouped with the *Maf*  
308 family. Supplemental Figure 3B.

309

310 **Maf (3 clusters):** This dorsal, excitatory family was comprised of Excit-5, Excit-6,  
311 and Excit-7. All three clusters expressed enriched levels of *Rora* (which was  
312 broadly expressed in many other clusters at lower levels). Excit-5 also expressed  
313 *Pvalb*, Excit-6 expressed *Rorb* and *Cpne4*, and Excit-7 was distinguished by having  
314 only nuclei from the Rosenberg dataset and expressed the immature neuron  
315 marker *Dcx*, suggesting an immature phenotype. The similarity of Excit-7 with  
316 Excit-3, Excit-4, Excit-5, and Excit-6 suggests a shared lineage relationship



317 between these families. This family also expressed low levels of Slc17a8 (vGlut3).  
318 Supplemental Figure 3B.

319  
320 **Reln (4 clusters):** This dorsal, excitatory family was comprised of Excit-8, Excit-9,  
321 Excit-10, and Excit-11. These clusters expressed enriched levels of Car12 (in  
322 particular in Excit-9 and Excit-10), the neuropeptide receptors Trhr (Excit-8),  
323 Npr1 (Excit-9 and Excit-10), and Nmur2 (Excit-10) and the neuropeptide Grp  
324 (Excit-9). Supplemental Figure 3C.

325  
326 **Rreb1 (2 clusters):** This dorsal, excitatory family was comprised of Excit-12 and  
327 Excit-13. These clusters also express Satb1 and either Zim1 (Excit-12) or Nmur2  
328 and Crh (Excit-13). Supplemental Figure 3C.

329  
330 **Sox5 (6 clusters):** This dorsal, excitatory family was comprised of Excit-14, Excit-  
331 15, Excit-16, Excit-17, Excit-18, and Excit-19. Within this family, Excit-14 and  
332 Excit-15 were slightly separated and also similar to the Rreb1 family clusters and  
333 expressed Col5a2 (Excit-14) or Col5a2 and Enpp1 (Excit-15). Excit-16, Excit-18,  
334 and Excit-19 expressed the neuropeptides Tac1 (Excit-16), Nmu-hi/Tac2-lo (Excit-  
335 18), and Tac2hi/Nmu-lo (Excit-19). Excit-17 included almost exclusively nuclei  
336 from the Rosenberg dataset and expressed the immature neuron marker Dcx,  
337 suggesting an immature phenotype. As this cluster was similar to Excit-16, Excit-  
338 18, and Excit-19, this may suggest a shared lineage relationship between these  
339 clusters. Figure 3.

340  
341 **Megf11 (1 cluster):** This Excit-20 cluster displayed features of dorsal excitatory  
342 neurons and mid excitatory neurons, being located in lamina 4/5 and being  
343 grouped with mid neurons in principal component space in the uMAP and  
344 dendrogram analysis. It expressed Megf11 and Mdga1.

345  
346 **Dorsal Inhibitory:**

347  
348 **Rorb & Adamts5 (5 clusters):** This dorsal, inhibitory family was comprised of  
349 Inhib-1, Inhib-2, Inhib-3, Inhib-4, and Inhib-5. Each of these clusters, except  
350 Inhib-2, expressed Rorb. Inhib-2 is grouped with this family based on its  
351 proximity in principal component space, as reflected in the uMAP and  
352 dendrogram analysis. In addition to Rorb, Inhib-1 expressed Sorcs3, Inhib-3  
353 expressed Rorb and Nppc as well as Nrgn, Inhib-4 expressed Rorb and Rxfp2,  
354 and Inhib-5 did not express these other genes. Inhib-2 expressed Sorcs3 and  
355 Adamts5. Inhib-1 and Inhib-2 represent deeper dorsal (lamina 3) clusters, Inhib-3  
356 was distributed throughout the dorsal horn, and Inhib-4 and Inhib-5 were  
357 relatively rare clusters (as judged by the harmonized cluster sizes and the in situ  
358 counts) and were found in the superficial laminae (1/2). Supplemental Figure 3D.

359

360 **Cdh3 (3 clusters):** This dorsal, inhibitory family was comprised of Inhib-6, Inhib-7,  
361 and Inhib-8. Inhib-6 and Inhib-7 expressed Cdh3 and were distinguished by co-  
362 expression of Kcnip2 and Pvalb in Inhib-7. While Inhib-8 contained only low  
363 levels of Cdh3 in this analysis, Cdh3 expression was confirmed by in situ  
364 hybridization and this cluster was included in this family based on proximity in  
365 principal component space as reflected in the uMAP and dendrogram analysis.  
366 Inhib-8 expressed Khl14. Supplemental Figure 3D.

367  
368 **Pdyn (3 clusters):** This dorsal, inhibitory family was comprised of Inhib-9, Inhib-  
369 10, and Inhib-11. Each of these clusters expressed Pdyn, while Inhib-10 also  
370 expressed Gal and Mlxipl and Inhib-11 also expressed Gal only. Of note, the  
371 clusters in this family also expressed Rorb and Nrgn. Supplemental Figure 3E.

372  
373 **Npy (2 clusters):** This dorsal, inhibitory family was comprised of Inhib-12 and  
374 Inhib-13. These clusters expressed Npy and were distinguished by low levels of  
375 Vgf (Inhib-12) or by expression of Qrfpr (Inhib-13). Supplemental Figure 3E.

376  
377 **Chat (1 cluster):** This Inhib-14 cluster is a deep dorsal (lamina 4), inhibitory and  
378 cholinergic population and also expressed Nos1.

379  
380 **Mid/Deep Dorsal Horn Clusters:** Of note, mid clusters generally were less robust than  
381 dorsal clusters.

382  
383 **Excitatory (ME)/Lmx1b (5 clusters):** This family of mid, excitatory clusters was  
384 comprised of Excit-21, Excit-22, Excit-23, Excit-24, and Excit-25. These clusters  
385 expressed Lmx1b, suggesting a dl5/dIL<sup>B</sup> embryonic origin. All of the clusters  
386 except Excit-25 expressed Tacr1 and Excit-21 also expressed Lypd1, suggesting  
387 that these are candidate ascending populations<sup>3</sup>. These clusters could also be  
388 distinguished by expression of Zfhx3 (Excit-21 and Excit-22) or Nfib (Excit-23,  
389 Excit-24, and Excit-25), which corresponded to lateral Zfhx3 and medial Nfib sub-  
390 types. Other markers sub-divided the clusters in a combinatorial manner,  
391 including Nms (Excit-21), Bcl11a (Excit-22 through Excit-25), Satb1 and Cdh23  
392 (Excit-23, Excit-24, and Excit-25), Cep112 (Excit-23 and Excit-24), and Prox1  
393 (Excit-25). Of note, nearly all of the cells and nuclei in this family were from the  
394 Rosenberg and Sathyamurthy datasets. Supplemental Figure 3F.

395  
396 **Excitatory (ME) (4 clusters):** This family of mid, excitatory clusters was  
397 comprised of Excit-26, Excit-27, Excit-28, and Excit-29. These clusters do not  
398 express Lmx1b, in contrast to the other mid excitatory family and may be derived  
399 from ventral embryonic lineages. Excit-26 expressed Nfib, Excit-27 expressed  
400 Adamts2, Excit-28 expressed Chat and Pitx2 and thus likely corresponds to V0c  
401 neurons, and Excit-29 expressed Pmfbp1. Excit-28 and Excit-29 also express  
402 Onecut2 and Pou6f2, potentially revealing a link with ventral cell types. Of note,  
403 nearly all of the cells and nuclei in this family were from the Rosenberg and

404 Sathyamurthy datasets and Excit-26 in particular was predominantly from the  
405 Rosenberg dataset. Supplemental Figure 3A and 3F.

406  
407 **Excit-30/CC# (1 cluster):** This cluster was marked by Gbx2, Neurod2, and Sp8 and  
408 there was partial evidence that it corresponded to Clarke's column. This cluster  
409 expressed multiple genes associated with Clarke's column including Chmp2b,  
410 Syt4, Ebf3, Rgs4, and Enc1<sup>6</sup>. The Clarke's column marker gene, Gdnf, was  
411 expressed at very low levels in the merged dataset, but was present in several  
412 Excit-30 cells. However, this cluster only contained two defined spinocerebellar  
413 cells from the Baek et al. dataset while the majority of this cluster was from the  
414 Hayashi dataset, arguing against a Clarke's column identity and also suggesting a  
415 V2 embryonic lineage. As the in situ hybridization experiments were performed  
416 on lumbar spinal cord sections, we did not validate markers for this cluster.

417  
418 **Inhibitory (MI) (7 clusters):** This family of mid, inhibitory clusters was comprised  
419 of Inhib-15, Inhib-16, Inhib-17, Inhib-18, Inhib-19, Inhib-20, and Inhib-21, all of  
420 which expressed the glycinergic marker Slc6a5 (with the exception of Inhib-21)  
421 and also the gabaergic marker Gad2. Inhib-15 expressed Prox1, Gabra1, and  
422 Nfib, Inhib-16 expressed Gpc3 and Sema5b, Inhib-17 expressed Satb2, Inhib-18  
423 expressed Sema5b, Inhib-19 expressed Ccbe1 and Pou6f2, Inhib-20 expressed  
424 higher levels of Tfp2b as well as Zfhx3, and Inhib-21 expressed Nfib and was  
425 distinguished by having only Gad2 and not Slc6a5 and was mainly derived from  
426 the Rosenberg dataset. Supplemental Figure 3G.

427  
428 **Ventral Clusters:** In general, the ventral clusters had less distinct gene expression  
429 patterns and were less robust than dorsal and mid clusters; therefore, the final  
430 identities of these clusters should be considered with caution. We identified several  
431 genes that contribute to overlapping gene expression patterns across clusters by being  
432 present in a spatial region of the cord and in diverse mid/ventral cell types. For  
433 example, Pou6f2 was expressed in the deep dorsal horn and in the dorsal part of the  
434 ventral horn and was enriched in mid-excitatory (Excit-21, Excit-28, and Excit 30), ventral  
435 excitatory (Excit-34 and Excit-35), and a ventral inhibitory (Inhib-24) clusters that are  
436 located within this domain. Similarly, Nfib was expressed in the medial deep dorsal horn  
437 (mid) spinal cord and was enriched in both excitatory (Excit-23, Excit-25, and Excit-30)  
438 and inhibitory (Inhib-15 and Inhib-21) clusters. Of note, several cluster "markers" of  
439 ventral cell types, such as Sim1, were not observed in adult spinal cord tissue and likely  
440 represent lingering RNA from developmental samples.

441  
442 **Excitatory (VE) (8 clusters):** This family of ventral, excitatory clusters was  
443 comprised of Excit-31, Excit-32, Excit-33, Excit-34, Excit-35, Excit-36, Excit-37,  
444 and Excit-38. Excit-31, Excit-32, Excit-33, and Excit-34 expressed low but positive  
445 levels of Lhx2, Lhx9, and Isl1, potentially suggesting dorsal dl1/dl2/dl3 embryonic  
446 lineages for these clusters. These clusters could be distinguished by Gm26673,  
447 Syt2, and Prlr (Excit-31), Mdga1 and Prlr (Excit-32), and Bnc2 and Pou6f2 (Excit-

448 34). Excit-35, Excit-36, and Excit-37 are likely derived from the V2a lineage, as  
449 they expressed *Vsx2* (*Chx10*) and included many cells from the Hayashi dataset  
450 that sorted cells based on *Chx10* genetic expression. Excit-35 also expressed  
451 *Vamp1*, *Pou3f1*, *Shox2*, and *Pou6f2* and Excit-36 expressed *Esrrg*. Intriguingly,  
452 many cells from the Baek dataset, which sorted cells based on spinocerebellar  
453 status were found in Excit-35, suggesting an important synaptic target of this  
454 population. Excit-37 expressed the V3 marker gene *Sim1* as well as *Rnf220*.  
455 Supplemental Figure 3H.

456  
457 **Inhibitory (VI) (6 clusters):** This family of ventral, inhibitory clusters was  
458 comprised of Inhib-22, Inhib-23, Inhib-24, Inhib-25, Inhib-26, and Inhib-27. Each  
459 of these clusters expressed the glycinergic marker *Slc7a5*. Inhib-22 and Inhib-27  
460 also expressed the gabaergic marker *Gad2*, *Pax2*, and *Pou6f2*. They were  
461 distinguished by low levels of *Gata3* expression in Inhib-27, which may represent  
462 V2b lineage. Inhib-23 and Inhib-25 expressed *Foxp2* and *Esrrb*, suggesting they  
463 correspond to the *Foxp2* clade of V1 lineage neurons. They were distinguished  
464 by expression of *Gm26673* and *Pvalb* in Inhib-23, which may suggest that this  
465 cluster included Ia-inhibitory neurons. Inhib-24 expressed both *Pou6f2* and  
466 *Nr5a2*, suggesting that this cluster corresponded to the *Pou6f2/Nr5a2* clade of  
467 V1 lineage neurons. Inhib-26 was the most robust ventral cluster and expressed  
468 the Renshaw marker genes *Chrna2*, *Chrna7*, and *Calb1*, suggesting that this  
469 cluster corresponded to Renshaw cells. Supplemental Figure 3I.

## 472 Comparison to Two Previously Published Atlases

473  
474 To determine how these neuronal clusters relate to previously characterized transcriptomic  
475 spinal cord cell types, we focused on the original clusters from the Sathyamurthy and Haring  
476 datasets because these two studies included a common set of cell types (dorsal horn neurons)  
477 and provided the most analysis, annotation, and marker validation for their respective cell  
478 types. First, we analyzed how cells/nuclei from the original studies were distributed into the  
479 new harmonized cluster of the meta-analysis (Figure 4A). Some ventral neurons from the  
480 Sathyamurthy dataset appeared in low-quality clusters that were discarded from the  
481 harmonized analysis due to low counts of genes per cell/nucleus and a lack of marker genes,  
482 whereas some neurons from the Haring dataset were classified as non-neural cell types or  
483 appeared in doublet clusters that were also discarded from the harmonized analysis.  
484 Nevertheless, we found that most original cell types fell within one of the harmonized neuronal  
485 atlas clusters or split into a small group of related neuronal clusters. The co-clustering between  
486 cells and nuclei from the original studies revealed many cell type similarities. For example, the  
487 majority of Haring *Glut12* cells split into harmonized clusters Excit-14 and Excit-15, together  
488 with nuclei from Sathyamurthy DE-12 and DE-16 (Figure 4A). This is consistent with the original  
489 characterizations of these clusters, in that Haring *Glut12* was principally marked by *Grpr* and  
490 *Qrfpr*, Sathyamurthy DE-12 was principally marked by *Grpr*, and Sathyamurthy DE-16 was  
491 principally marked by *Col5a2* together with *Qrfpr*. In addition, prior comparison of the overall

492 gene expression pattern of Haring Glut12 was most closely correlated with Sathyamurthy DE-12  
 493 and DE-16. This suggests that Glut12 and DE-12/DE-16 represent similar cell types that the  
 494 Haring study kept as one cluster but which Sathyamurthy study split into two clusters. In the  
 495 harmonized analysis and in the in situ hybridization validation above (Figure 3B,D), both Excit-  
 496 14 and Excit-15 are relatively robust clusters (with robustness scores of 0.88 and 0.85,  
 497 respectively) and can be distinguished by expression of Enpp1 in Excit-15, supporting the  
 498 splitting of these related cell types into two distinct clusters.

499  
 500 **Figure 4**

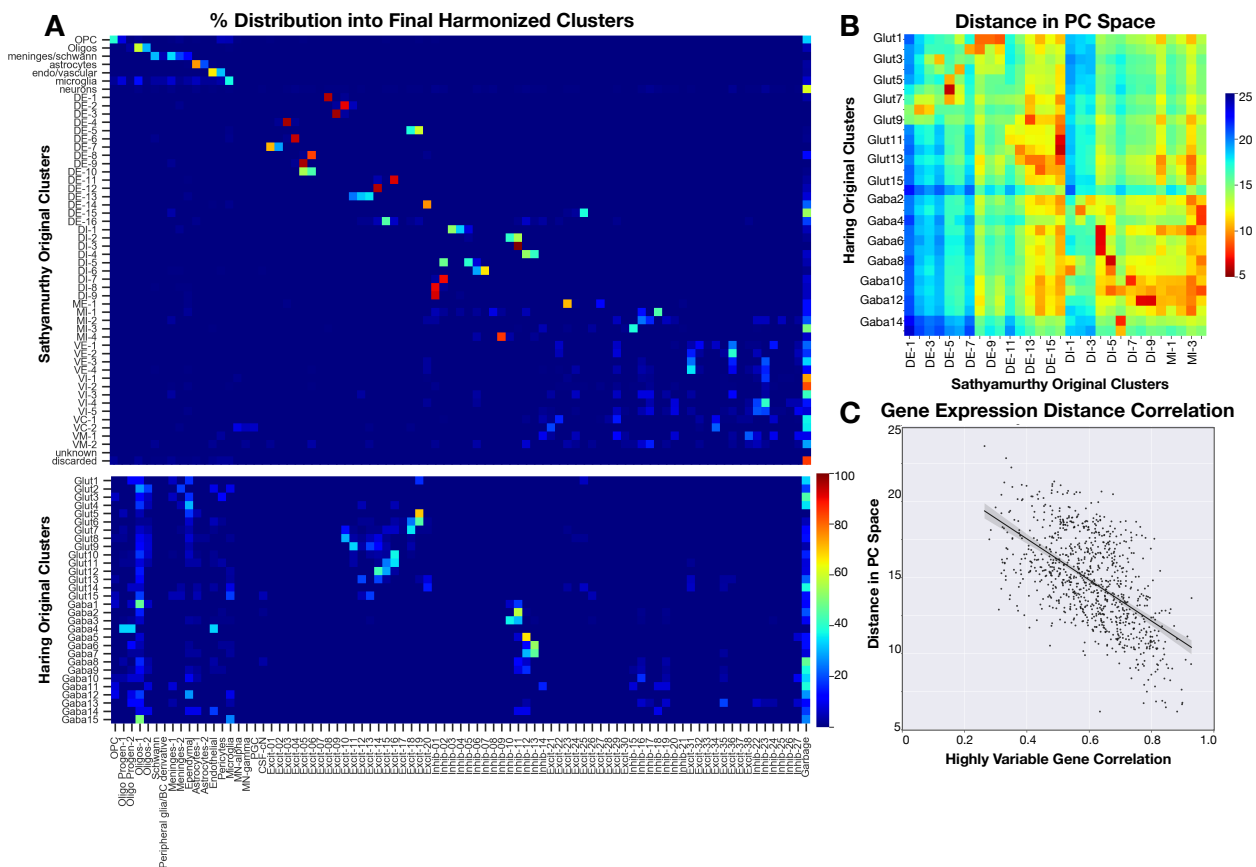

501  
 502  
 503 **Figure 4. Relationship with two previously published spinal cord atlases.** (A) The distribution of cells from the  
 504 original clusters of the Sathyamurthy and Haring datasets (rows) into the harmonized clusters (columns), ranging  
 505 from 0 blue to 100% red distribution. (B) The distance between the centroids of the cells/nuclei from the original  
 506 Haring and Sathyamurthy clusters, measured in 50 dimensional principal component (PC) space. Only dorsal  
 507 neuron clusters are shown for the Sathyamurthy dataset and in both datasets, every other cluster is labeled.  
 508 Relatively short distances = red; long distances = blue. (C) Relationship between the distance in PC space and the  
 509 correlation in gene expression between pairs of clusters from the Haring and Sathyamurthy datasets.

510  
 511 To compare the overall relationships between cells/nuclei from the Haring and Sathyamurthy  
 512 studies with our harmonized meta-analysis, we calculated the distance in harmonized principal  
 513 component “space” between the centroid of cells/nuclei from each original study’s cell types as

514 well as correlation in expression of highly variable genes for each pair of cell types (Figure 4B,C).  
515 We found that increasing correlation between the original clusters' gene expression strongly  
516 predicted closeness in the harmonized principal component space, suggesting that co-clustering  
517 in the harmonized analysis should accurately preserve and reveal relationships with the cell  
518 types described in the original studies (Figure 4C).

519

### 520 **Using Machine Learning to Classify Spinal Cord Cell Types**

521

522 With this atlas of spinal cord cell types in hand, we next sought to establish a means to  
523 standardize and automate spinal cord cell type classification. First, we tested three strategies  
524 that have been used successfully to classify single cell data from other tissues on their ability to  
525 classify spinal cord cells into coarse cell types. These were label transfer<sup>13</sup>, a support vector  
526 machine, and a fully connected neural network (with two hidden layers of 512 nodes and L2  
527 regularization for each). It is important to note that each of these models were trained using  
528 cell type labels from the harmonized analysis because there is no existing gold standard for  
529 spinal cord cell identities. In this context, the analysis that follows should be considered a  
530 feasibility study for machine learning classifiers on spinal cord single cell count data. The full  
531 merged dataset of 101,070 cells and nuclei was tested, including low quality cells and nuclei  
532 and doublets, in order to represent the full range of input raw data. All three strategies  
533 performed well, with label transfer showing the best performance (overall accuracy of 89%),  
534 followed by the neural network (83%), and then the SVM (80%) (Figure 5A and Supplemental  
535 Table 4).

536

537



538 **Figure 5**

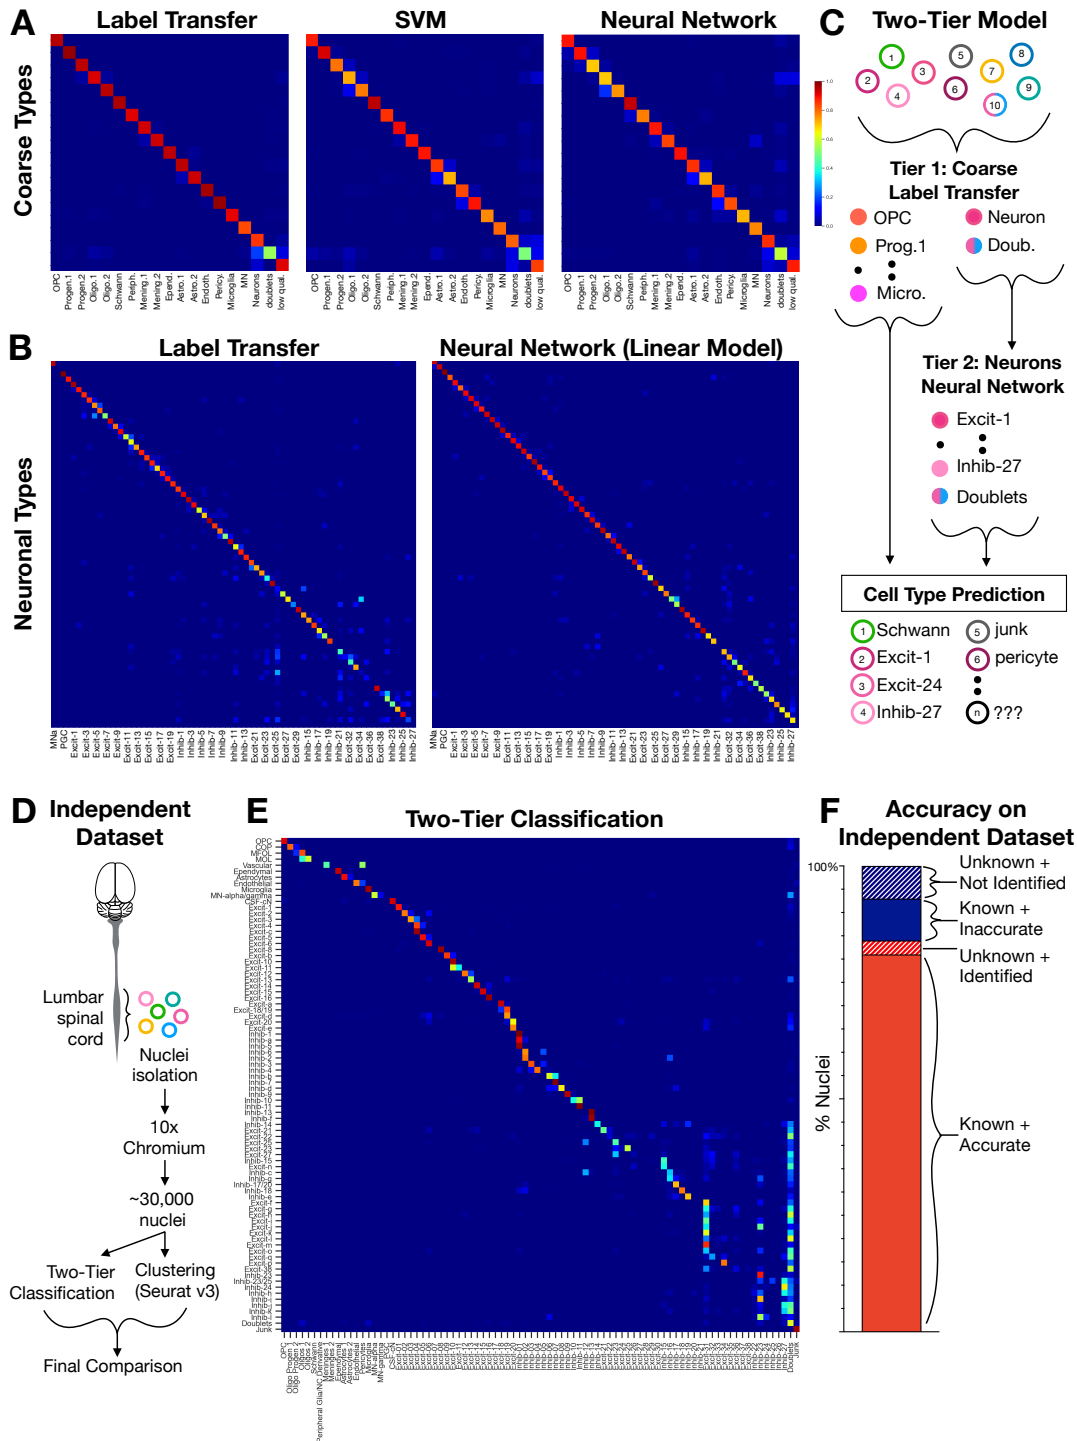

539  
540

541 **Figure 5. Computational classification of spinal cord cell types.** (A) Confusion matrices of the F1 scores for the  
542 classification of coarse cell types using label transfer, a support vector machine (SVM), and a fully connected neural  
543 network (neural net), (blue = 0; maroon = 1). The actual cell types are in rows and the predicted cell types are in  
544 columns in the same order. (B) Confusion matrices of the F1 scores for the classification of fine neuronal sub-types

545 using label transfer and a fully connected neural network. The actual cell types are in rows and the predicted cell  
546 types are in columns, both in the order presented in Table 1. Alternating cell types are labeled. (C) Model of the  
547 two-tiered classification approach in which all cells/nuclei are classified into coarse cell types using label transfer  
548 (also including low-quality “junk” and “doublets”). Subsequently, all cells/nuclei that were classified as neurons,  
549 motoneurons, or doublets by label transfer are further classified into 69 neuronal cell types (also including  
550 “doublets”). (D) Experimental design for generating an independent set of single nucleus RNA sequencing data. (E)  
551 Distribution plot showing how nuclei from each cluster (rows) were distributed into each of the harmonized cell  
552 types (columns), normalized by rows with dark blue = 0.0 fraction; maroon = 1.0 fraction). (F) Bar plot of the total  
553 counts of nuclei that were from “known” clusters and were correctly classified (81% of total), that were from  
554 “known” clusters and were incorrectly classified (9% of total), that were from “unknown” clusters but could be  
555 identified by their classification (3% of total), or that were from “unknown” clusters and could not be identified  
556 (7% of total). OPC=oligodendrocyte precursor cell; progen.1=oligodendrocyte progenitor 1;  
557 progen.2=oligodendrocyte progenitor 2; Olig.1=oligodendrocyte 1; Olig.2=oligodendrocyte 2; Periph.=peripheral  
558 glia; Mening.1=meninges 1; Mening.2=meninges 2; Epend.=Ependymal cells; Astro.1=astrocytes 1;  
559 Astro.2=astrocytes 2; Endoth=endothelial cells; Pericy.=pericytes; MN=motoneurons; low qual.=low quality.  
560 MNa=motoneurons alpha; PGC=preganglionic cell.

561  
562 Next, we tested label transfer and neural networks on a more refined and challenging task: the  
563 classification of 69 neuronal sub-types. For label transfer, a two-tiered analysis was performed  
564 (dorsal sub-types and then mid/ventral sub-types) because we found that this approach was  
565 important for clustering spinal cord neurons. For the neural networks, a non-exhaustive  
566 handsweep of several hyperparameters was conducted, including network depth, optimizer,  
567 number of hidden nodes, and the number of training epochs and seven different models were  
568 tested (see Methods and Supplemental Table 4). We found that a linear model (with no  
569 regularization and with an SGD optimizer) showed the best performance, with an overall test  
570 accuracy of 85% (Figure 5B and Supplemental Table 4). The model showed very high confidence  
571 scores for correct predictions; however, performance varied with cell type prevalence  
572 suggesting a target for improving the model in the future (Supplemental Figure 4).

573  
574 How should the performance of this model be viewed and should we expect automated  
575 classification to achieve 100% accuracy? Perfect performance would require perfect biological  
576 data: discrete cell types that express completely distinct patterns of gene expression and  
577 experimental data without doublets, low quality cells, or other sources of indeterminate data.  
578 Knowing that this is not possible, we still sought to determine a benchmark performance guide  
579 for the classification adult mouse spinal cord neurons using neural network models and  
580 considered four metrics of cluster definition and separation. We examined the relationship  
581 between the model performance for each cluster (F1 score) and (1) the co-clustering frequency  
582 of each cell type across 100 clustering iterations, (2) how distant each cluster was from its  
583 nearest neighbor in principal component space, and (3) the confidence with which clusters  
584 could be distinguished based on in situ marker expression (measured by in situ analysis sets of  
585 clusters) (Supplemental Figure 4). We found that the model performance varied with the co-  
586 clustering frequency of each cluster and with the ability to identify cell types in situ and we  
587 propose that these measures can be used to set a reasonable expectation for neural network  
588 performance. Overall, neuronal cells/nuclei of a given type co-clustered together 65% of the  
589 time (average from Supplemental Figure 2E) and a total of 70% of cells could be classified in situ

590 (Supplemental Table 3). In comparison, the model's accuracy of 85% reveals the outstanding  
591 performance of this approach.

592

593 To develop a standardized pipeline for classification of independent datasets unrelated to the  
594 original studies analyzed above, we considered a two-tiered approach that would take  
595 advantage of the strengths of both the label transfer for coarse classification (Tier 1) and a  
596 neural network model for classification of neuronal sub-types (Tier 2) (Figure 5C). We first  
597 selected all cells/nuclei that were assigned as doublets or neurons during the harmonized  
598 analysis above to represent the output of the first-tier and input to the second tier. In this  
599 context, we trained another set of five neural network models (see Methods and Supplemental  
600 Table 4). A neural network model with one hidden layer (256 nodes) and SGD optimizer showed  
601 the best performance (overall accuracy of 80%) and was selected for further work.

602

603 As a final performance test of the two-tiered model, we applied it to spinal cord nuclei from an  
604 independent experiment. Nuclei were isolated from the lumbar spinal cords of four adult mice,  
605 sequenced using 10x Chromium, clustered using Seurat, and marker genes were identified for  
606 each cluster (Figure 5D). 90% of nuclei (out of 28,584 total) were in clusters that could be  
607 assigned a cell-type label based on user-based marker gene expression ("known" clusters). In  
608 cases for which labels could not be confidently assigned (10% of nuclei, "unknown" clusters), a  
609 placeholder name was given. We performed classification of all nuclei from the independent  
610 dataset that passed quality-control thresholds (Figure 5C) in an analysis that took less than  
611 thirty minutes of computational time (~20 minutes for Tier 1 and less than one minute for Tier  
612 2).

613

614 We found that 90% of nuclei from "known" clusters were accurately classified by the two-tiered  
615 model (Figure 5F "known + accurate"). We next considered how this model performed upon  
616 the classification of nuclei from the challenging "unknown" clusters that could not be identified  
617 based on marker genes. Surprisingly, we found that 28% of unknown nuclei could be identified  
618 with the two-tier classification model (Figure 5F "unknown + identified"). Thus, the two-tiered  
619 model surpassed the ability of experienced users to identify spinal cord cell types.

620

621 Of note, several cell types were not expected to be present in the independent dataset,  
622 including Schwann cells, peripheral glia and meninges 2 (based on the surgical dissection  
623 method used that did not include spinal roots or outer layers of meninges) and including PGC,  
624 Excitatory-7, and Excitatory-17 (based on the lumbar region and adult age that was used). As  
625 expected, these cell types were not predicted by the two-tiered model. There were also several  
626 cell types that were not classified as expected. In particular, several mid/ventral cell types were  
627 not detected in the independent dataset while two ventral clusters (Excitatory-31 and  
628 Inhibitory-27) were over-represented. This may reflect a training dataset that is not large  
629 enough to train a model that distinguishes closely related cell types, that small cell types are  
630 not modeled as well, and that some mid/ventral clusters are defined partly by early postnatal  
631 gene expression contained within the harmonized analysis but absent from the independent  
632 adult dataset.

633

634 These results establish a two-tiered model based on label transfer and a neural network as an  
635 effective approach for the computational classification of single cell sequencing data, even in  
636 the context of the finely separated populations of spinal cord neurons. The neural network  
637 model was at least as accurate as other methods such as Seurat-based clustering and high-  
638 content *in situ* hybridization and was orders of magnitude faster. In addition, it can standardize  
639 spinal cord cell type classification so that a unified and harmonized set of cell types can be  
640 identified and studied consistently between datasets, biological conditions, and laboratories  
641 throughout the field.

642

### 643 **SeqSeek: A Community Resource for Analyzing and Classifying Spinal Cord Cell Types**

644

645 Finally, we have developed an online resource for spinal cord single cell data, SeqSeek  
646 (available at [seqseek.ninds.nih.gov](http://seqseek.ninds.nih.gov)). This resource includes user-friendly tools to search gene  
647 expression across spinal cord cell types using single genes or gene lists and to view spatial  
648 distributions of selected marker genes (SeqSeek Genes), to compare gene expression between  
649 clusters or groups of clusters (SeqSeek Cell-Types), and to access the SeqSeek algorithm for cell  
650 type classification (SeqSeek Classify).

651

652

## 653 **DISCUSSION**

654

655 For the field of spinal cord biology to build upon the incredible promise of single cell  
656 technologies, it is critical to establish a standard set of cell types. Here, we leveraged and  
657 expanded upon the previously published single cell sequencing studies of the postnatal mouse  
658 spinal cord to define 84 types of spinal cord cells. We present a harmonized atlas of these cell  
659 types; a validated combinatorial panel of markers to facilitate their study either *in vivo*, in tissue  
660 sections, and *in vitro* cell culture; computational resources for classifying spinal cord cells based  
661 on transcriptomics; and a web-based resource, SeqSeek, to allow the community to interact  
662 with and explore single cell spinal cord data. This work establishes a common framework that  
663 will serve as a powerful resource for the field and facilitates the discovery of new biological  
664 features of spinal cord cell types.

665

666 The first key consideration for this atlas is whether the cell types of the atlas are correct. In the  
667 absence of a commonly accepted standard set of spinal cord cell types, it is impossible to  
668 answer this question completely. However, several pieces of evidence support the accuracy of  
669 the harmonized clusters. First, these clusters are robust to different clustering approaches,  
670 suggesting that they reflect underlying biological signatures rather than a technical artifact.  
671 Second, these clusters correspond well with prior gene expression studies of the postnatal  
672 spinal cord, including three single nucleus sequencing datasets that were not included in the  
673 harmonized clustering: an independent dataset that we clustered separately and used to test  
674 the SeqSeek Classify algorithm, and two very recent studies that found similar markers to the  
675 harmonized set<sup>8,9</sup>. Third, and most importantly, nearly all of the predicted marker neuronal co-  
676 expression patterns could be validated in tissue and several represent well-established  
677 molecular markers of accepted “cell types”.

678

679 In addition to serving as a powerful reference resource, what new biological information can  
680 this study reveal? By incorporating the analysis of six independent studies we have been able to  
681 resolve cell types at a granular level and created the most comprehensive description of spinal  
682 cord cell types to date. In particular, the increased power from studying many neurons across  
683 postnatal development allowed us to better characterize mid and ventral cell types. While  
684 these clusters still display low to moderate robustness, this is mainly because they are highly  
685 related to each other through overlapping gene expression patterns. Previously, we noted this  
686 trend amongst ventral clusters and we now identify spatial patterns of gene expression (such as  
687 *Pou6f2* and *Nfib*) as a source of this relatedness. We propose that the combination of  
688 embryonic lineage and settling location contribute to the definition of cell types in the mid and  
689 ventral horn regions. This in turn gives rise to both cell type heterogeneity and the overall  
690 similarity of the mid area and ventral horn clusters.

691

692 Another type of new biological insight is based on the co-clustering of cells defined by different  
693 parameters. For example, the largest fraction of neurons from Hayashi et al., which isolated  
694 V2a lineage derived neurons co-clustered within Excit-35 together with the largest fraction of  
695 neurons from Baek et al., which isolated spinocerebellar neurons. This co-clustering suggested  
696 that these cells are highly similar and may link V2 embryonic origin with spinocerebellar circuit  
697 connectivity. In support of this connection, the established V2a marker genes *Shox2* and *Sox14*  
698 were both identified as markers of putative lamina VII spinocerebellar tract neurons in the  
699 original Baek et al. study. Thus, co-clustering of cells across different studies can reveal  
700 candidate linkages across cell type features and illustrates the power of a harmonized atlas  
701 across time and biological conditions.

702

703 This study also highlights important experimental and analytical parameters. On the  
704 experimental side, this study revealed the differences between using cells versus nuclei for  
705 transcriptomic profiling. As expected, we found that single cell studies detected more genes per  
706 cell than single nucleus studies did per nucleus, but that single cells also showed higher levels of  
707 stress response gene expression. Unexpectedly, we also found that the major single cell atlas of  
708 the juvenile mouse nervous system failed to include any ventral interneurons or motoneurons  
709 while these were found readily even in adult tissue that used single nuclei. Whether this  
710 reflects greater vulnerability of ventral cells to tissue dissociation and cell stress, or whether  
711 other technical limitations were present, remains to be determined.

712

713 On the analytical side, this work is among the first practical applications of automated  
714 classification for large and complex single cell datasets. A wide range of cell annotation  
715 approaches have been described recently but it is not yet clear which methods will work best  
716 for each type of data<sup>14-18</sup>. A comparative analysis of automated classification approaches across  
717 diverse datasets found that SVM and neural network models showed the best performance on  
718 the Allen Brain Atlas dataset of 92 neuronal cell types – a dataset similar in scale and  
719 complexity to the harmonized analysis here<sup>18</sup>. This analysis also found that performance  
720 depends partly on the number of cell types and the “complexity” (the relatedness between  
721 clusters) of a dataset, similar to what we observed.

722

723 The described here displayed excellent performance in the computationally challenging task of  
724 classifying cells and nuclei into the 69 “fine” resolution neuronal cell types of the spinal cord. In  
725 the future, larger spinal cord single cell datasets will be available and the neural network model  
726 that we presented here can be refined and improved. Specifically, larger training datasets may  
727 facilitate classification of closely related mid/ventral neuronal populations; region or sample  
728 age specific training datasets may reduce the number of cell types that cannot be detected; and  
729 generative models may be used to enhance training on rare cell populations. As this work  
730 proceeds, we expect that increasingly powerful neural network models will be developed that  
731 allow rapid, accurate, and standardized classification of all spinal cord cell types directly from  
732 raw sequencing data. This could be done by individual users with downloadable models or  
733 through the development of a spinal cord single cell data commons that could continuously  
734 refine the models and provide classification analysis through a cloud-based platform, similar to  
735 what has been proposed for the Human Cell Atlas<sup>19</sup>. A forthcoming study aims to partially  
736 address these challenges. Theis and colleagues propose a method called *single-cell architectural*  
737 *surgery* that uses transfer learning to map query datasets onto a reference, simultaneously  
738 contextualizing the query while updating the reference. This allows for decentralized reference  
739 building without the sharing of raw data, which could further increase effectiveness of neural  
740 network-based classifiers<sup>20</sup>.

741

742 There are several notable limitations to this study and to single cell transcriptomics in general.  
743 Most specifically, this analysis is limited in scope to RNA expression in the postnatal mouse  
744 spinal cord. As more data become available from studies that include more specific regions of  
745 the spinal cord, more biological conditions, more developmental stages, more species, more  
746 specific cellular features, and more -omics modalities, we anticipate that this work will reveal  
747 exciting new insights from single cell data. As examples, future work could incorporate  
748 embryonic single cell data<sup>7</sup> and lineage tracing to link together developmental origin with  
749 postnatal cell types or could focus deeply on specific spinal cord regions and cell types. Indeed,  
750 forthcoming work has revealed an impressive diversity of PGC visceral motoneurons that are  
751 enriched in either the thoracic or sacral spinal segments<sup>21,22</sup>. Relatedly, the in situ hybridization  
752 experiments here are also limited in scope, being specific to the adult lumbar spinal cord. The  
753 failure to detect several genes could reflect that these genes are no longer expressed at the  
754 adult stage or lumbar region that we analyzed, that the cell types themselves are not present  
755 (being transiently found in early postnatal stages or only in other spinal cord regions), or  
756 technical issues. As new data and technologies become available, we anticipate an explosion of  
757 single cell data and the opportunity to periodically supplement, evolve, revise, and refine the  
758 work presented here.

759

760 A second notable caveat is that this analysis is all population based. Data is captured from  
761 thousands of individual cells, but the rate of false negative data in each cell and the  
762 requirement for statistical power necessitates analyzing many cells of each type and  
763 considering population level shared patterns. It is likely that by emphasizing common patterns,  
764 this analysis underrepresents true biological variability, including “noisy” gene expression and  
765 continua of cell types. For example, three very different methods – single cell data clustering,



766 multi-plexed in situ hybridization, and an artificial intelligence neural network – all showed a  
767 relatively weak ability to classify ventral cell types into discrete types and a relatively strong but  
768 still imperfect ability to classify dorsal cell types. We propose that this reflects some technical  
769 limitations but also a fundamental complexity and diversity in how gene expression is  
770 controlled within individual cells and in cell type populations.

771  
772 Finally, it is crucial to note that single cell/nucleus profiling, particularly single cell/nucleus RNA  
773 sequencing, produces one perspective on cell types and it is not yet clear how this will relate to  
774 other core cellular features such as developmental lineage, circuit connectivity,  
775 electrophysiology, and behavioral function. Re-considering the very definition of “cell type” and  
776 identifying the most useful system for classifying cells is now a fundamental task in  
777 understanding nervous system function. We expect that in each tissue, indeed in each region of  
778 each tissue, there may be different organizing principles of “cell types”. In that context, the  
779 work here provides a comprehensive atlas of spinal cord transcriptomic cell types that can be  
780 used as a framework to compare with other cellular features.

781  
782 Overall, this work brings together the first six single cell studies of the post-natal mouse spinal  
783 cord to create a standard reference set of spinal cord cell types. It will (1) serve as a unifying  
784 resource and nomenclature for the field, (2) provide a validated and combinatorial set of  
785 markers that can be used to translate this rich sequencing data back into tissue based studies,  
786 (3) be a template for the computational analysis of single cell data from complex neural tissue,  
787 and (4) facilitate the community-wide use of single cell data through a web-based resource. We  
788 hope that this work will facilitate the design and interpretation of cell-based studies of behavior  
789 and will open up opportunities for many new discoveries.

## 790 791 **METHODS**

### 792 793 Mice:

794 Animal experiments were performed in accordance with institutional guidelines and approved  
795 (protocol #1384) by the National Institute of Neurological Disorder and Stroke’s Institutional  
796 Animal Care and Use Committee. An even balance of male and female mice that were 9 weeks  
797 old and of mixed C57BL/6J and BALB/cJ background were used for single nucleus sequencing  
798 (four mice) and validation studies (six mice).

### 799 800 Published Data Acquisition:

801 Published data were downloaded from the NCBI Sequence Read Archive (SRA). Raw datasets  
802 were used instead of investigator-provided count matrices so that we could align all sequences  
803 to the same genome and apply uniform data filtering. All raw datasets were pre-processed  
804 using technique-specific pipelines. For data from Sathyamurthy et al. (DropSeq,  
805 GEO:GSE103892, SRA:SRP117727), data were downloaded in fastq format from SRA. A count  
806 matrix was created following the steps in the McCarroll lab DropSeq cookbook<sup>23</sup>. For data from  
807 Hayashi et al. (GEO: GSE98664, SRA: SRP106644) and Zeisel et al. (SRA:  
808 SRP135960) both 10X, 10X sequence data were download from SRA in BAM  
809 format then converted to cellranger-compatible fastq files using the 10X-

810 provided bamtofastq tool<sup>24</sup>. Count matrices were created using the 10X cellranger count tool<sup>25</sup>.  
811 Data from Haring et al. (C1 Fluidigm, GEO: GSE103840, SRA:  
812 SRP117627) were downloaded from SRA. Each cell had its own fastq file for a total of 1545  
813 files. We followed the UMI tools -single cell tutorial<sup>26</sup> to remove the UMI and process  
814 the sequences. For the Rosenberg et al. data (SplitSeq, GEO: GSE10823, SRA: SRP133097),  
815 data were downloaded in fastq format. Count matrices were made using the split-seq-pipeline  
816 tool developed by the Seelig Lab<sup>27</sup>. The STAR alignment tool within cellranger (v020201) was  
817 used to align the sequences from each dataset to a reference genome that was custom built to  
818 include all introns and exons.

819

### 820 Merged Analysis and Clustering:

821 Count matrices for each dataset were merged to obtain the full data file and we then applied  
822 uniform data filtering across the merged file. We analyzed all cells and nuclei with at least 200  
823 detected genes (to exclude low quality or “empty” barcodes) and with less than 5% of  
824 transcripts being mitochondrial (to exclude lysing cells or mitochondria-nuclei doublets). This  
825 yielded over one hundred thousand total cells/nuclei. Of note, by starting with the raw data  
826 and setting relatively relaxed thresholds for data inclusion, we analyzed more cells/nuclei from  
827 several of the original studies than were analyzed in the corresponding published datasets.  
828 The merged data was analyzed using Seurat v3. Clustering was performed in three phases on  
829 (1) all cell types, (2) all neurons, (3a) presumptive ventral neurons and (3b) motoneurons. For  
830 phase 1, data integration was performed by study, 2,000 highly variable genes were detected,  
831 and the most significant principal components were identified by elbow plot and manual  
832 inspection of the contributing gene lists and 28 PCs were used for clustering. To select cluster  
833 resolution, a range of values were tested from 0.2 to 8 and cluster evolution or clustree plots  
834 were used to determine when cluster splitting stabilized, and resolution 1.2 was selected. For  
835 phase 2, raw data from all cells in neuronal clusters was used, re-scaled, re-normalized, and re-  
836 integrated, the top 4,000 highly variable genes were detected and the top 40 PCs were selected  
837 (using the approach described above). Resolutions from 0.8 through 10 were tested and a  
838 resolution of 8 was selected. A third phase of targeted sub-clustering was done because  
839 mid/ventral and motoneuron sub-types did not separate well in preliminary neuron analysis.  
840 Indeed, the robustness scores for mid/ventral cell types were very low until they are analyzed  
841 in a focused principal component space (Supplemental Figure 2). For phase 3a, presumptive  
842 ventral neurons were identified by markers and by coalescence on uMAP into a central “blob”  
843 and for phase 3b, motoneurons were identified by expression of classic markers (Chat, Isl1,  
844 Prph). In each case, the procedures described above were used to sub-divide these cell types  
845 and the following parameters were used: 3a: 40 PCs, resolution 4; 3b 7 PCs, resolution 0.6.

846

847 For all three phases, each cluster was analyzed for candidate marker genes and excluded if the  
848 cluster met either of the following criteria. Clusters were considered “low-quality” if they had  
849 fewer than three significant markers relevant to cell type, particularly if they showed very low  
850 nGene. Clusters were considered “doublets” if they had significant markers for multiple  
851 unrelated cell types and a “barnyard” plot of the top ten markers of each cell type showed that  
852 individual cells in the cluster displayed both sets of markers. For all three phases, we used the  
853 following method to determine whether candidate pairs of clusters should be merged: a

854 dendrogram based on mean gene expression and UMAP location were used to systemically  
855 identify closely related clusters and we then probed for differential gene expression. Pairs with  
856 fewer than three genes enriched in each cluster (six total) were merged unless a “classic”  
857 marker gene from the literature was one of five differentially expressed genes. Cell type  
858 annotations for the non-neuronal cell types were based on the presence of well-established  
859 marker genes (Supplemental Table 1) and on the gene expression patterns in the Allen in situ  
860 hybridization database (for meningeal, ependymal, Schwann cell and peripheral glia clusters).

861  
862 The meta-data (and associated final cell labels) are available in Supplemental Table 5.

863

#### 864 Cell Type Relationships and Comparison with Prior Studies

865 To examine the relationship between the 69 neuronal clusters in the harmonized analysis, the  
866 centroid of each cluster was calculated by grouping the cells by their labels and determining the  
867 mean of each PC. Then, the pairwise Euclidean distance between each cluster was calculated  
868 using 50 PCs. This was passed to the stats::hclust function using method = “complete”. The final  
869 dendrogram was plotted using the graphics::plot function.

870

871 To examine the distribution of the original Haring and Sathyamurthy clusters amongst the  
872 harmonized clusters, the frequency of each pair-wise combination of original and harmonized  
873 clusters was counted. These data were then pivoted to wide form to produce the matrix with  
874 harmonized clusters along the x-axis and original clusters along the y-axis. Finally, the data was  
875 row-normalized, so that the color represents the fraction of the original label occurring in each  
876 harmonized cluster.

877

878 To examine the distance between the original Haring and Sathyamurthy clusters in harmonized  
879 PC space, the pairwise distance between the centroids of the original clusters was calculated as  
880 above. Small distances, representing close clusters, are displayed with hot colors, while large  
881 distances, representing far apart clusters, are displayed with cold colors.

882

883 To examine the correlation between PC distance and the expression of the 500 most highly  
884 variable genes in the harmonized data, the average expression of these genes was calculated  
885 for each original cluster, which yielded two matrices: one a genes by cluster matrix of the  
886 Haring data, and the other a gene by cluster matrix of the Sathyamurthy data. The correlation  
887 of gene expression in each cluster between these matrices was calculated using the  
888 lineup::corbetw2mat function (CRAN version 0.37.11). These correlation scores were then  
889 plotted against the PC distances calculated above. A linear regression with 95% confidence  
890 intervals is shown.

891

#### 892 RNA In situ Hybridization:

893 14 µm fresh frozen spinal cord sections from segment L4 on Leica Apex slides were used with a  
894 set of 97 RNAScope HiPlex probes (Supplemental Table 2) from ACDBio, according to the  
895 manufacturer’s instructions. Images for each set were registered using RNAScope HiPlex Image  
896 Registration Software and brightness/contrast were adjusted using Adobe Photoshop. Counting  
897 of cells for each set were done as follows. Set 1: All Chat+ cells in any laminae. Set 2: Any dorsal

898 cell that expressed any of *Cpne4*, *Maf*, or *Prkcg*. Set 3: Any cell in the dorsal horn with any of  
899 *Slc17a6*, *Rreb1*, *Reln*, or *Car12*. In addition, *Gbx2* cells were counted separately amongst any  
900 cell in the deep dorsal horn with *Slc17a6*. Set 4: Any cell in the dorsal horn with any of *Col5a2*,  
901 *Enpp1*, *Sox5*, *Tac1*, *Tac2*, *Nmu*, *Megf11*, *Mdga1*, *Pmfbp1*, or *Onecut2*. Set 5: Any cell in laminae  
902 1-4 with any of *Slc6a1*, *Gad2*, or *Kcnip2*. Set 6: Any cell in the dorsal horn with any of *Mlxipl*,  
903 *Pdyn*, *Gal*, *Npy*, *Qrfpr*, *Sstr2*, or *Rspo3*. Set 7: Any cell in laminae 4-6 with any of *Slc17a6*,  
904 *Adamts2*, *Lmx1b*. Set 8: Any cell in laminae 4-6 with either *Slc6a5* or *Gad2*. Set 9: Any cell in  
905 laminae 6-8 with *Slc17a6*. Set 10: Any cell in laminae 6-8 with any of *Pax2*, *Slc6a5* or *Gad2*. The  
906 number of cells counted in each set are listed in Supplemental Table 2 and were from one  
907 section per animal, though multiple sections per animal were inspected for expression pattern  
908 consistency. Sections from three animals (2 male and 1 female or 2 female and 1 male) were  
909 counted for each set.

910

#### 911 Single Nucleus Sequencing:

912 Nuclei were obtained as previously described<sup>28</sup> and were processed for single cell sequencing  
913 using the 10X Genomics Chromium Single Cell 3' Kit (v3 chemistry) and sequenced at a depth of  
914 approximately 50,000 reads per nucleus. Clustering was performed as described above and  
915 cluster identities were determined using the combinatorial marker code in Table 1 where  
916 possible ("known clusters"). Clusters that could not be identified in this manner were analyzed  
917 for neurotransmitter status and given a placeholder identification ("unknown clusters").

918

#### 919 Computational Classification:

920 *Label Transfer:* Label transfer analysis was performed using Seurat v3(.1.5). For both coarse cell  
921 types and clean neurons, 10% of cells were withheld as the query dataset, whilst the remaining  
922 were used as the reference dataset. Broadly, label transfer consists of two-steps. First, the  
923 transfer anchors are identified using the `FindTransferAnchors` function. Second, these anchors  
924 are then used to transfer cluster labels to the query dataset with the `TransferData` function.

925

926 For label transfer of coarse cell types, `FindTransferAnchors` was called with `reduction =`  
927 `"pcaproject"`, `dims = 1:28`, and `npcs = NULL` to project the previously calculated PCA onto the  
928 query data using the same dimensions as were used in clustering the reference data.  
929 `TransferData` was also called with `dims = 1:28` for the same reason.

930

931 Label transfer of clean neurons was performed in a two-step process. First, all cells in mid- or  
932 ventral-clusters were grouped as one cluster. Then, the dorsal-clusters were transferred along  
933 with one "mid/ventral" cluster. Second, those cells classified as "mid/ventral" were labelled  
934 using only neurons from mid- or ventral-neuron clusters. In each case, a new reference object  
935 was created from the appropriate cells – all neurons for step 1 and mid-/ventral-neurons only  
936 for step 2 – via integration, as previously discussed in "Merged Analysis and Clustering". Label  
937 transfer was run as described for coarse cell types, with the exception that `dims = 1:100` was set  
938 for all neurons, and `dims = 1:30` was set for mid-/ventral-neurons.

939

940 In the final two-tier analysis, label transfer was performed as discussed for coarse cell types.  
941 Any cells labelled "Neuron", "Motorneuron", or "Doublets" were passed to the neural network

942 for further classification. The decision to include doublets for further classification was founded  
943 on the observation that a non-trivial number of neurons were mis-classified as doublets at the  
944 coarse cell-type level.

945

946 *Support Vector Machine:* Support vector machine analysis was performed using scikit-learn  
947 version 0.22.2.post1. Count matrices were taken from the default Seurat RNA assay count slot  
948 as sparse matrices. Cluster labels were numerical encoded with LabelEncoder(). To preserve  
949 sparsity for reduced training time, these counts were scaled with MaxAbsScaler(copy=False). As  
950 LinearSVC() is known to be a faster and more scalable than SVM(kernel="linear"), it was  
951 selected for use<sup>29</sup>. As the number of samples was significantly greater than the number of  
952 features, the dual parameter was set to "False"<sup>30</sup>. Finally, to help ensure convergence, the  
953 max\_iter parameter was increased from the default of 1000 to 10000. This pipeline achieved an  
954 overall accuracy of 80% on the validation data. Though this performance could likely be  
955 improved by hyperparameter tuning, given the performance of alternative models, the support  
956 vector machine was not selected for further use.

957

958 *Neural Networks:* Count Matrices were taken out of the default Seurat RNA assay count slot as  
959 sparse matrices. The counts were log x+1 transformed then scaled by the maximum number of  
960 counts for any gene in a cell. The data were converted into TensorFlow sparse tensors for input  
961 into neural networks define via the Keras interface to TensorFlow. Hyperparameters were  
962 initially set to default values, with a network structure consisting of direct connections between  
963 the input and output nodes. This simple linear model was the baseline. We added additional  
964 layers from 1 to 4 hidden layers, at various widths from 16 nodes to 512 nodes in a layer. The  
965 optimizer we switch from the default "Adam" optimizer to singular gradient descent (sgd). L1,  
966 L2 and dropout regularization were attempted. Additionally, various batch sizes were tested.  
967 Initially, networks trained for coarse analysis used a batch size of 128 to speed training.  
968 Whereas the training was faster, validation accuracy improved by around 5% when we lowered  
969 the batch size to 32. No additional improvement was seen at a batch size of 16, so the batch  
970 size was set to 32 for the rest of the study. In general, we used the learning curves to guide the  
971 changing of hyperparameters<sup>31</sup>.

972

973 For the analysis of coarse cell types (Figure 5A), a model with two hidden layers of 512 nodes  
974 each and L2 regularization was used. For the analysis of the neuronal sub-types (Figure 5B),  
975 seven models were tested: (1.1) a linear model with no regularization (1.2) a linear model with  
976 L2 regularization (learning rate 0.001) (1.3) a neural network with two hidden layers of 512  
977 nodes each (1.4) an ensemble-like neural network with one hidden layer (128 nodes and L2  
978 regularization) and two hidden layers that were concatenated, (1.5) a neural network model  
979 with three hidden layers (512, 256, 128 and L2 regularization on the 512 node hidden layer  
980 (1.6) a neural network model with 3 layers (128, 128, 128 and L2 regularization on the first  
981 hidden layer) and (1.7) a linear model with no regularization with an SGD optimizer.

982 Interestingly, the baseline model had the largest validation accuracy. Since the training  
983 accuracy is 100% as compared to 85% in the validation set, the model is clearly over fitting the  
984 training data. Adding regularization helped to lower the gap between the training and  
985 validation accuracy, but the overall validation and test accuracies are still lower suggesting that



986 the over trained model will perform better on unseen data. Additional work to improve this  
987 model is needed and adding more data from new experimental studies in the future will help  
988 improve the validation accuracy. For the analysis and training of neurons and doublets together  
989 (Tier 2), five models were tested: (2.1) a linear model with no regularization (2.2) a linear model  
990 with L2 regularization (2.3) a neural network model with one hidden layer of 128 nodes (2.4) a  
991 neural network model with one hidden layer of 128 nodes and SGD optimizer, and (2.5) a  
992 neural network model with one hidden layer of 256 nodes and SGD optimizer. The final model  
993 (2.5) was selected for Tier 2.

994

995 In the analysis of “unknown clusters” (Figure 5F), individual nuclei were “identified” if (1) they  
996 were from an “unknown” cluster and were classified into a harmonized true cell type (not  
997 “junk” or “doublets”) and (2) at least 80% of the total nuclei from their cluster of origin were  
998 classified into the same single harmonized cell type.

999

#### 1000 **Data Availability**

1001 Raw sequencing data from single nucleus sequencing will be available for download at GEO  
1002 upon publication. A searchable version of all data is available [www.seqseek.ninds.nih.gov](http://www.seqseek.ninds.nih.gov) and  
1003 links to all raw data will be available at the same site. Associated code is available at  
1004 <https://github.com/ArielLevineLabNINDS>.

1005

#### 1006 **Acknowledgements**

1007 We are grateful to Dr. Vilas Menon (Columbia University) for his advice throughout this project  
1008 and to Mr. Stefan Stoica for technical assistance with the validation data analysis. This work was  
1009 supported by the Intramural Research Program of the NIH, NINDS and CIT. This research was  
1010 supported in part by an appointment to the National Institute of Neurological Disorders and  
1011 Stroke Research Participation Program administered by the Oak Ridge Institute for Science and  
1012 Education (ORISE) through an interagency agreement between the U.S. Department of Energy  
1013 (DOE) and the National Institute of Health. ORISE is managed by ORAU under DOE contract  
1014 number DE-SC0014664. All opinions expressed in this paper are the author’s and do not  
1015 necessarily reflect the policies and views of NIH, NINDS, DOE, or ORAU/ORISE.

1016

1017

#### 1018 **Author contributions**

1019 D.E.R, K.J.E.M, and A.J.L conceived of this project. D.E.R, S.C.K., and A.J.L carried out the merged  
1020 analysis and comparison of cell types with the literature. D.E.R. and R.B.P.C. carried out the cell  
1021 type analysis, study comparison analysis, and algorithm design and testing. L.L. carried out the  
1022 in situ hybridization experiments. R.B.P. C. and A.J.L wrote the manuscript and prepared figures,  
1023 with help from D.E.R., K.J.E.M., and S.C.K. All authors contributed to editing the final  
1024 manuscript.

1025

#### 1026 **Competing interests**

1027 The authors declare no competing interests.



1028 **REFERENCES**

1029

- 1030 1. Sathyamurthy, A. *et al.* Massively Parallel Single Nucleus Transcriptional Profiling Defines  
1031 Spinal Cord Neurons and Their Activity during Behavior. *Cell Rep* **22**, 2216–2225 (2018).
- 1032 2. Hayashi, M. *et al.* Graded arrays of spinal and supraspinal V2a interneuron subtypes  
1033 underlie forelimb and hindlimb motor control. *Neuron* (2018).
- 1034 3. Häring, M. *et al.* Neuronal atlas of the dorsal horn defines its architecture and links  
1035 sensory input to transcriptional cell types. *Nat Neurosci* **21**, 869–880 (2018).
- 1036 4. Rosenberg, A. B. *et al.* Single-cell profiling of the developing mouse brain and spinal cord  
1037 with split-pool barcoding. *Science* **360**, 176–182 (2018).
- 1038 5. Zeisel, A. *et al.* Molecular Architecture of the Mouse Nervous System. *Cell* **174**, 999–  
1039 1014.e22 (2018).
- 1040 6. Baek, M., Menon, V., Jessell, T. M., Hantman, A. W. & Dasen, J. S. Molecular Logic of  
1041 Spinocerebellar Tract Neuron Diversity and Connectivity. *Cell Rep* **27**, 2620–2635.e4  
1042 (2019).
- 1043 7. Delile, J. *et al.* Single cell transcriptomics reveals spatial and temporal dynamics of gene  
1044 expression in the developing mouse spinal cord. *Development* **146**, dev173807 (2019).
- 1045 8. Mona, B. *et al.* Positive autofeedback regulation of Ptf1a transcription generates the  
1046 levels of PTF1A required to generate itch circuit neurons. *Genes Dev.* **34**, 621–636 (2020).
- 1047 9. Skinnider, M. A. *et al.* Cell type prioritization in single-cell data. *Nat. Biotechnol.* **6**, 377–5  
1048 (2020).
- 1049 10. Dobrott, C. I., Sathyamurthy, A. & Levine, A. J. Decoding cell type diversity within the  
1050 spinal cord. *Current* **8**, 1–6
- 1051 11. Lähnemann, D. *et al.* Eleven grand challenges in single-cell data science. *Genome Biol.* **21**,  
1052 31–35 (2020).
- 1053 12. Nguyen, Q. H., Pervolarakis, N., Nee, K. & Kessenbrock, K. Experimental Considerations  
1054 for Single-Cell RNA Sequencing Approaches. *Front Cell Dev Biol* **6**, 108 (2018).
- 1055 13. Stuart, T. *et al.* Comprehensive Integration of Single-Cell Data. *Cell* (2019).  
1056 doi:10.1016/j.cell.2019.05.031
- 1057 14. Lopez, R., Regier, J., Cole, M. B., Jordan, M. I. & Yosef, N. Deep generative modeling for  
1058 single-cell transcriptomics. *Nat Meth* **15**, 1053–1058 (2018).
- 1059 15. Wagner, F. & Yanai, I. Moana: A robust and scalable cell type classification framework for  
1060 single-cell RNA-Seq data. *bioRxiv* 456129 (2018). doi:10.1101/456129
- 1061 16. Pliner, H. A., Shendure, J. & Trapnell, C. Supervised classification enables rapid  
1062 annotation of cell atlases. *Nat Meth* **16**, 983–986 (2019).
- 1063 17. Ma, F. & Pellegrini, M. Automated identification of Cell Types in Single Cell RNA  
1064 Sequencing. *bioRxiv* **15**, 532093 (2019).
- 1065 18. Abdelaal, T. *et al.* A comparison of automatic cell identification methods for single-cell  
1066 RNA sequencing data. *Genome Biol.* **20**, 194–19 (2019).
- 1067 19. Li, B. *et al.* Cumulus provides cloud-based data analysis for large-scale single-cell and  
1068 single-nucleus RNA-seq. *Nat Meth* **17**, 793–798 (2020).
- 1069 20. Lotfollahi, M. *et al.* Query to reference single-cell integration with transfer learning.  
1070 *bioRxiv* 2020.07.16.205997 (2020). doi:10.1101/2020.07.16.205997

- 1071 21. Blum, J. A. *et al.* Single-cell transcriptomic analysis of the adult mouse spinal cord. *bioRxiv*  
1072 **178**, 2020.03.16.992958 (2020).
- 1073 22. Alkaslasi, M. R. *et al.* Single nucleus RNA-sequencing defines unexpected diversity of  
1074 cholinergic neuron types in the adult mouse spinal cord. *bioRxiv* **228**, 2020.07.16.193292  
1075 (2020).
- 1076 23. Nemesh, J, Dropseq Core Computational Protocol, [http://mccarrolllab.org/wp-](http://mccarrolllab.org/wp-content/uploads/2016/03/Drop-seqAlignmentCookbookv1.2Jan2016.pdf)  
1077 [content/uploads/2016/03/Drop-seqAlignmentCookbookv1.2Jan2016.pdf](http://mccarrolllab.org/wp-content/uploads/2016/03/Drop-seqAlignmentCookbookv1.2Jan2016.pdf) (accessed  
1078 May 7, 2020)
- 1079 24. 10X Genomics support, Converting 10x BAM Files to  
1080 FASTQ, <https://support.10xgenomics.com/docs/bamtofastq> (accessed May 7, 2020)
- 1081 25. Single-Library Analysis with Cell Ranger, [https://support.10xgenomics.com/single-cell-](https://support.10xgenomics.com/single-cell-gene-expression/software/pipelines/latest/using/count)  
1082 [gene-expression/software/pipelines/latest/using/count](https://support.10xgenomics.com/single-cell-gene-expression/software/pipelines/latest/using/count) (accessed May 7, 2020)
- 1083 26. UMItools, Single Cell Tutorial, [https://github.com/CGATOxford/UMI-](https://github.com/CGATOxford/UMI-tools/blob/master/doc/Single_cell_tutorial.md)  
1084 [tools/blob/master/doc/Single\\_cell\\_tutorial.md](https://github.com/CGATOxford/UMI-tools/blob/master/doc/Single_cell_tutorial.md)
- 1085 27. Seelig Lab, Analysis Tools for Split-seq, <https://github.com/yjzhang/split-seq-pipeline>
- 1086 28. Matson, K. J. E. *et al.* Isolation of Adult Spinal Cord Nuclei for Massively Parallel Single-  
1087 nucleus RNA Sequencing. *J Vis Exp* e58413–e58413 (2018). doi:10.3791/58413
- 1088 29. <https://scikit-learn.org/0.22/modules/svm.html#svm-classification>
- 1089 30. [https://scikit-](https://scikit-learn.org/0.22/modules/generated/sklearn.svm.LinearSVC.html#sklearn.svm.LinearSVC)  
1090 [learn.org/0.22/modules/generated/sklearn.svm.LinearSVC.html#sklearn.svm.LinearSVC](https://scikit-learn.org/0.22/modules/generated/sklearn.svm.LinearSVC.html#sklearn.svm.LinearSVC)
- 1091 31. Ng, A. *Machine Learning Yearning*. (Deeplearning.ai). 2018.
